# Supplementary material for: Stitched peptides as potential cell permeable inhibitors of oncogenic DAXX protein
Source: Royal Society of Chemistry journal article supplement (doi:10.1039/d3cb00149k), 2023-01-01
Supplement: d3cb00149k1.pdf [file d3cb00149k1.pdf]

# ATRX 1255-1289

CR-0399-152 Clare\_09172014

Th. MW. 3959.23,

cr-0399-152-p5-1 6.2mg

PVTVDDDDDDNDPENRIAKKMLLEEIKANLSSDED

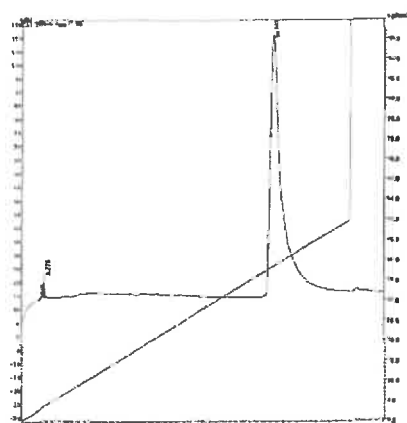

Th. 3959.23

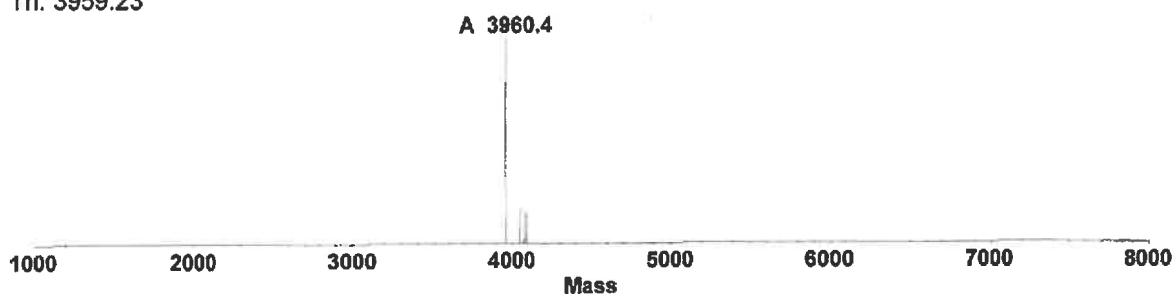

cr-0399-152-p5-2 1.4mg

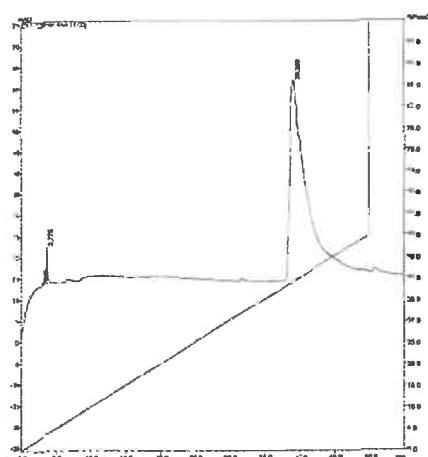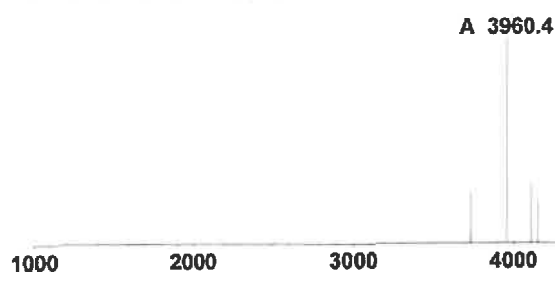

Clare-1-01192015-1

Th. MW 3425.78

ATRX 1255-1284

cr-0746-016-p4-1

PVTVDDDDDDNDPENRIAKKMLLEEIKANL

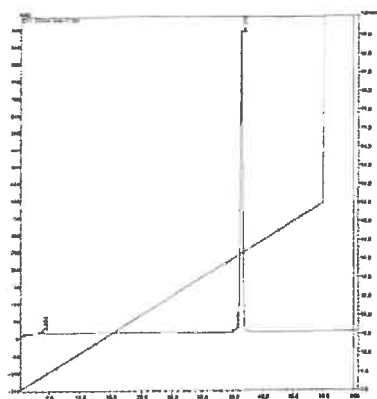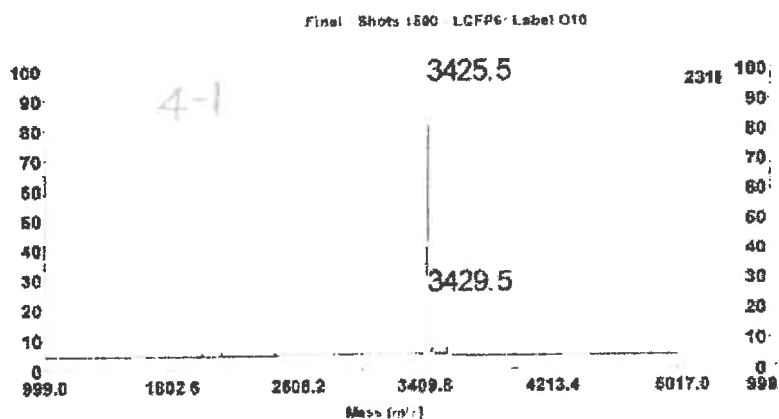

cr-0746-016-p4-2

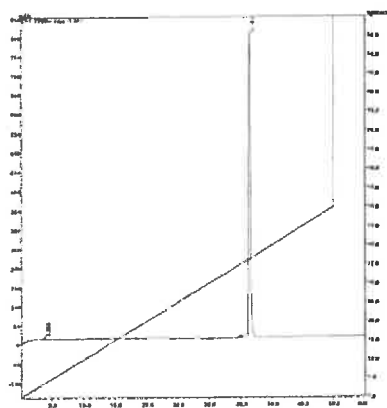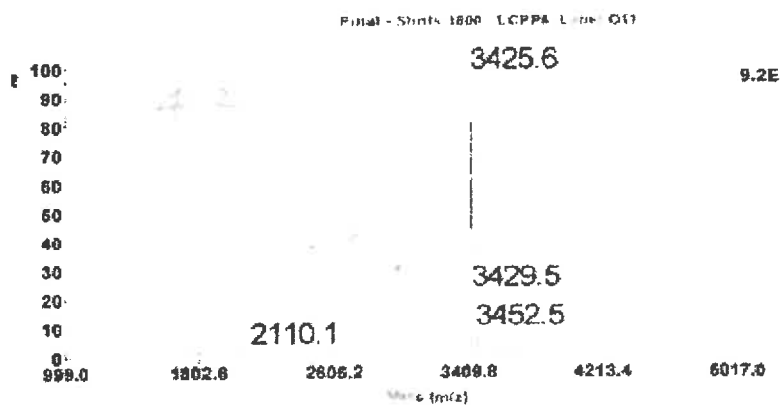

cr-0746-016-p4-3

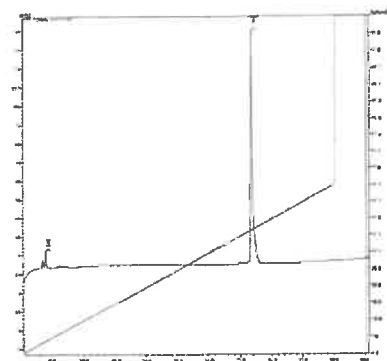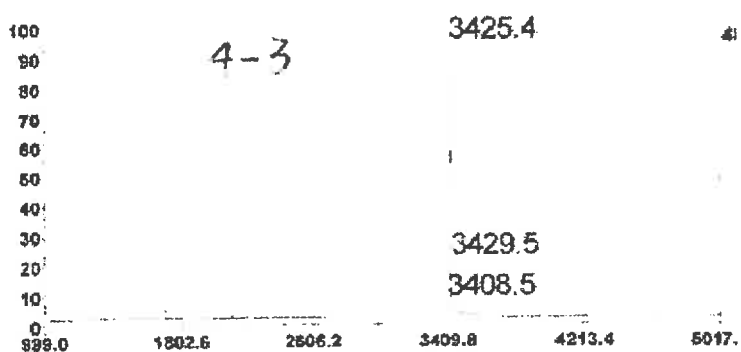

**Sequence:** DDDDNDPENRIAKKMLLEEIKANLSSDEDG

**Name:** ATRX6190

**M.W [M+H<sup>+</sup>]:** 3390.62

**Purity:** 96.31%

**Amount:** 9.5mg

## HPLC Result

Lot. No.: P141126-CP426467  
 Column: Gemini-NX 5 $\mu$  C18 110A, 4.6\*250mm  
 Solvent A: A: 0.1% Trifluoroacetic Acid in 100% Acetonitrile  
 Solvent B: B: 0.1% Trifluoroacetic Acid in 100% Water  
 Gradient:

|         | A    | B   |
|---------|------|-----|
| 0.0min  | 20%  | 80% |
| 25.0min | 45%  | 55% |
| 25.1min | 100% | 0%  |
| 30.0min | Stop |     |

Volume: 10 $\mu$ l Wavelength: 220nm Flow rate: 1.0ml/min

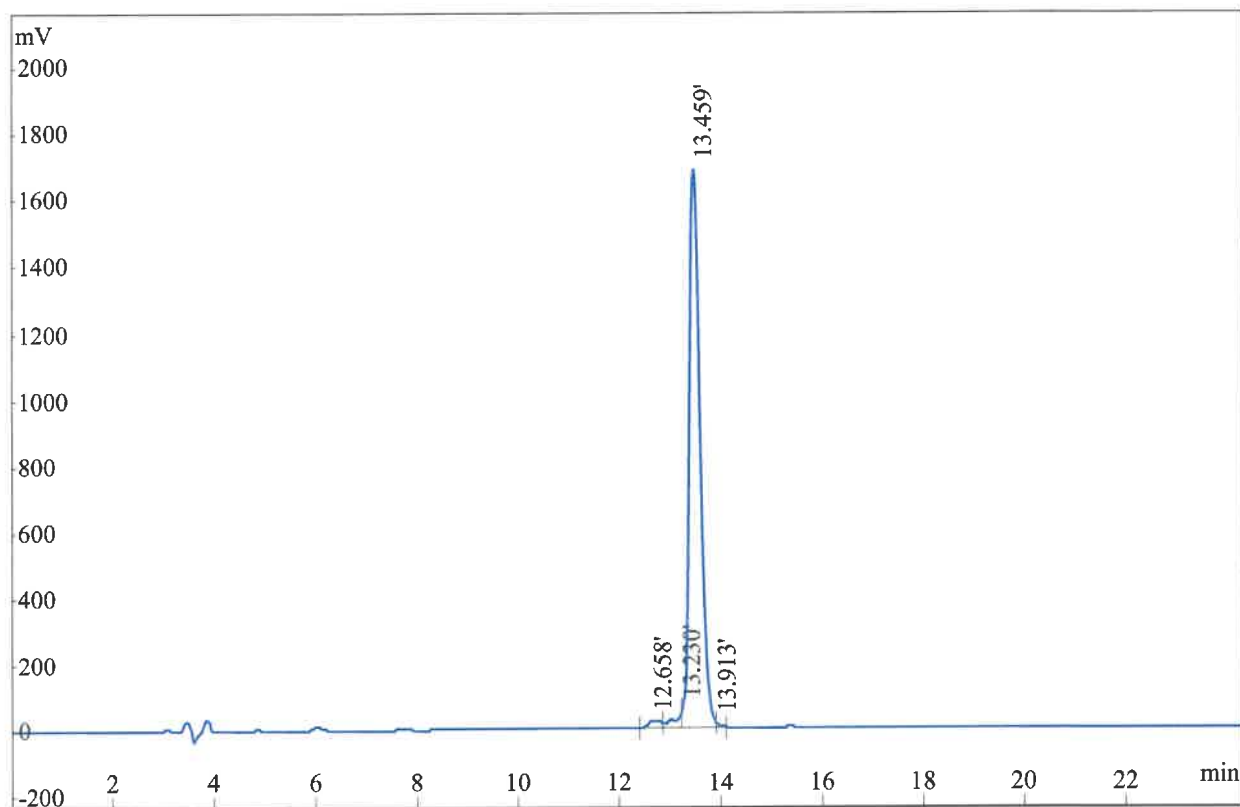

| Rank  | Time   | Conc.    | Area     |
|-------|--------|----------|----------|
| 1     | 12.658 | 1.4265   | 342298   |
| 2     | 13.230 | 2.0804   | 499201   |
| 3     | 13.459 | 96.3156  | 23111416 |
| 4     | 13.913 | 0.1775   | 42585    |
| Total |        | 100.0000 | 23995500 |

ATRX 1261-1290

Mass Spectrometry

CHEMPEPTIDE LIMITED

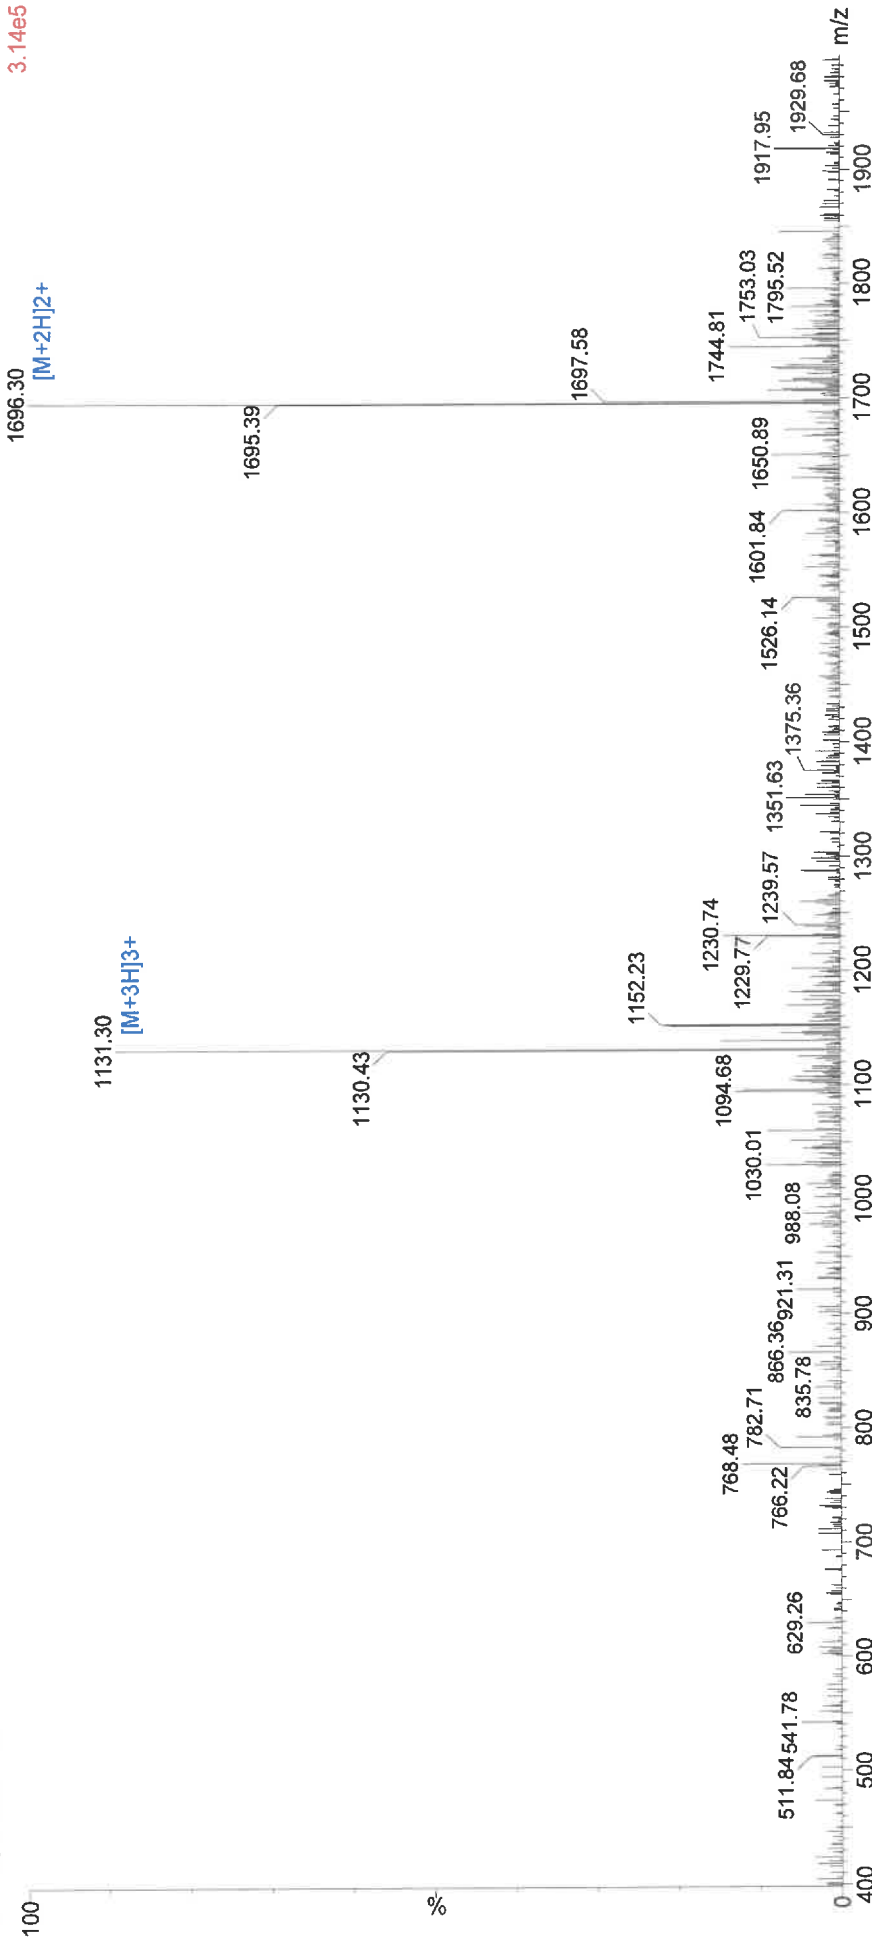

| Sample Description |                  | Instrument          |               |
|--------------------|------------------|---------------------|---------------|
| Analyzed date:     | 2014-12-2        | Probe:              | Waters ZQ2000 |
| Analyst:           | He               | Nebulizer Gas Flow: | ESI           |
| Sample:            | ATRX6190         | CDL:                | 1.5L/min      |
| M.W.:              | 3390.62          | CDL Temp.:          | -20.0v        |
| Lot. No.:          | P141126-CP426467 | Block Temp.:        | 250°C         |
|                    |                  | Probe Bias:         | +4.5kv        |
|                    |                  | Detector:           | 1.5kv         |
|                    |                  | T. Flow:            | 0.2ml/min     |
|                    |                  | B. Conc:            | 50%H2O/50%ACN |

# ATRX 1263-1290

CHEMPEPTIDE LIMITED

Sequence: DDNDPENRIAKKMLLEEIKANLSSDEDG

Name: ATRX6390

M.W [M+H<sup>+</sup>]: 3160.44

Purity: 95.44%

Amount: 9.3mg

## HPLC Result

Lot. No.: P141126-CP426468

Column: Gemini-NX 5 $\mu$  C18 110A, 4.6\*250mm

Solvent A: A: 0.1% Trifluoroacetic Acid in 100% Acetonitrile

Solvent B: B: 0.1% Trifluoroacetic Acid in 100% Water

| Gradient: | A    | B   |
|-----------|------|-----|
| 0.0min    | 20%  | 80% |
| 25.0min   | 45%  | 55% |
| 25.1min   | 100% | 0%  |
| 30.0min   | Stop |     |

Volume: 10 $\mu$ l Wavelength: 220nm Flow rate: 1.0ml/min

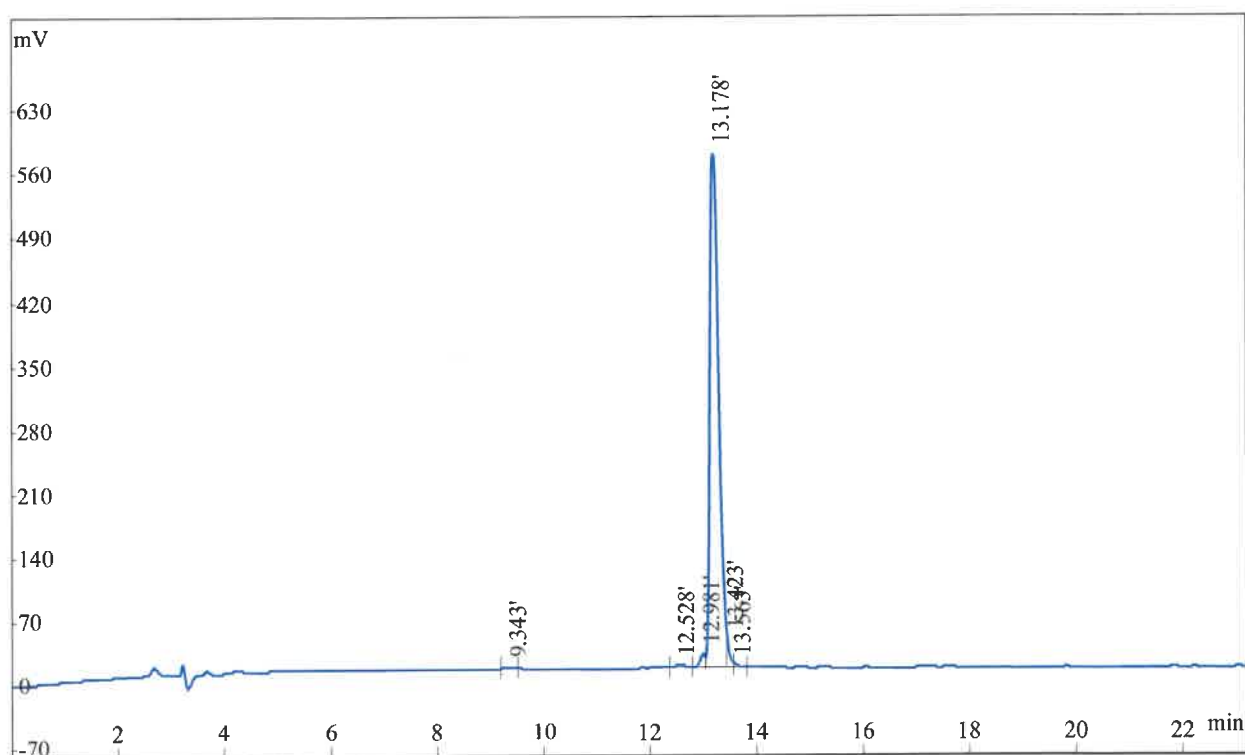

| Rank | Time   | Conc.   | Area    |
|------|--------|---------|---------|
| 1    | 9.343  | 0.3266  | 19906   |
| 2    | 12.528 | 0.7607  | 46361   |
| 3    | 12.981 | 1.5852  | 96614   |
| 4    | 13.178 | 95.4481 | 5817438 |
| 5    | 13.423 | 1.5965  | 97302   |
| 6    | 13.563 | 0.2829  | 17240   |

Total 100.0000 6094861

# ATRX 1263-1290

## Mass Spectrometry

CHEMPEPTIDE LIMITED

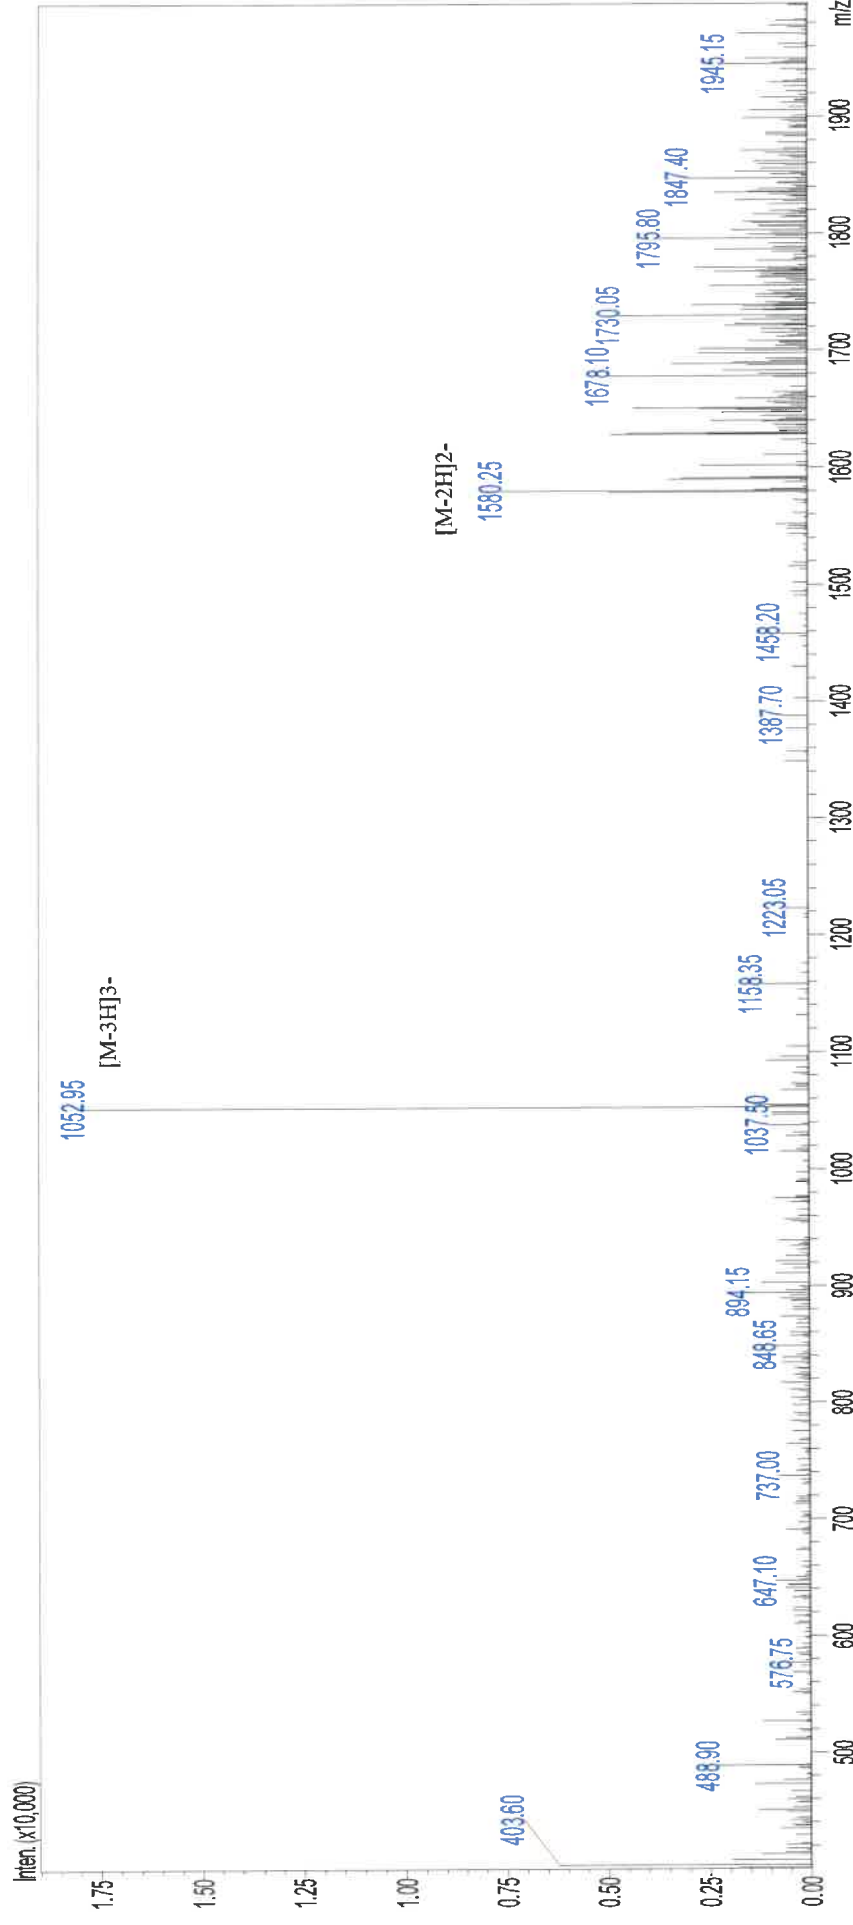

### Sample Description

Analyzed date: 2014-12-1  
Analyst: Xiong  
Sample: ATRX6390  
M.W.: 3160.44  
Lot. No.: P141126-CP426468

### Instrument

Probe: ESI  
Nebulizer Gas Flow: 1.5L/min  
CDL: -20.0v  
CDL Temp.: 250°C  
Block Temp.: 200°C

### SHIMADZU LCMS-2020

Probe Bias: +4.5kv  
Detector: 1.5kv  
T. Flow: 0.2ml/min  
B. Conc: 50%H2O/50%ACN

Sequence: NDPENRIAKKMLLEEIKANLSSDEDG

Name: ATRX6590

M.W [M+H<sup>+</sup>]: 2930.27

Purity: 95.13%

Amount: 9.5mg

#### HPLC Result

Lot. No.: P141126-CP426469  
 Column: Gemini-NX 5 $\mu$  C18 110A, 4.6\*250mm  
 Solvent A: A: 0.1% Trifluoroacetic Acid in 100% Acetonitrile  
 Solvent B: B: 0.1% Trifluoroacetic Acid in 100% Water  
 Gradient:

|         | A    | B   |
|---------|------|-----|
| 0.0min  | 20%  | 80% |
| 25.0min | 45%  | 55% |
| 25.1min | 100% | 0%  |
| 30.0min | Stop |     |

Volume: 10 $\mu$ l Wavelength: 220nm Flow rate: 1.0ml/min

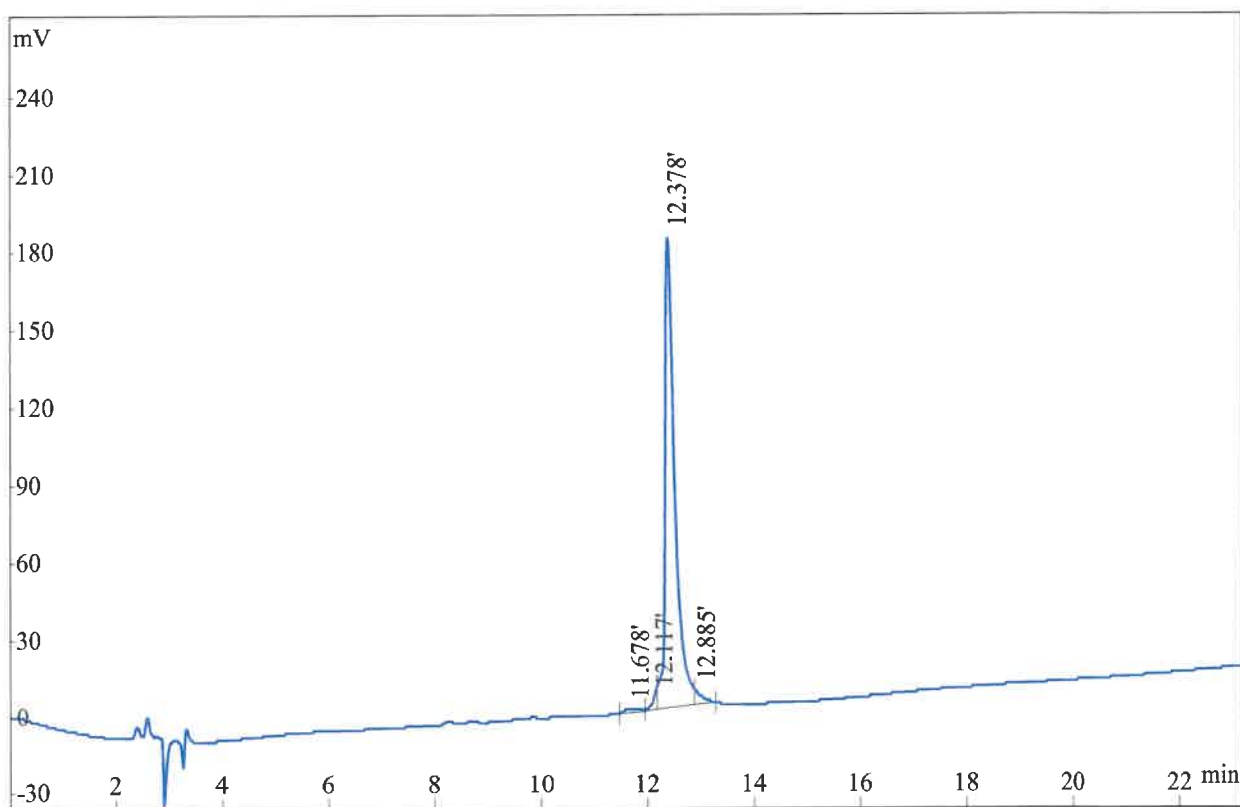

| Rank  | Time   | Conc.    | Area    |
|-------|--------|----------|---------|
| 1     | 11.678 | 0.9523   | 21572   |
| 2     | 12.117 | 1.7914   | 40581   |
| 3     | 12.378 | 95.1301  | 2154930 |
| 4     | 12.885 | 2.1262   | 48163   |
| Total |        | 100.0000 | 2265246 |

# ATRX 1265-1290

## Mass Spectrometry

CHEMPEPTIDE LIMITED

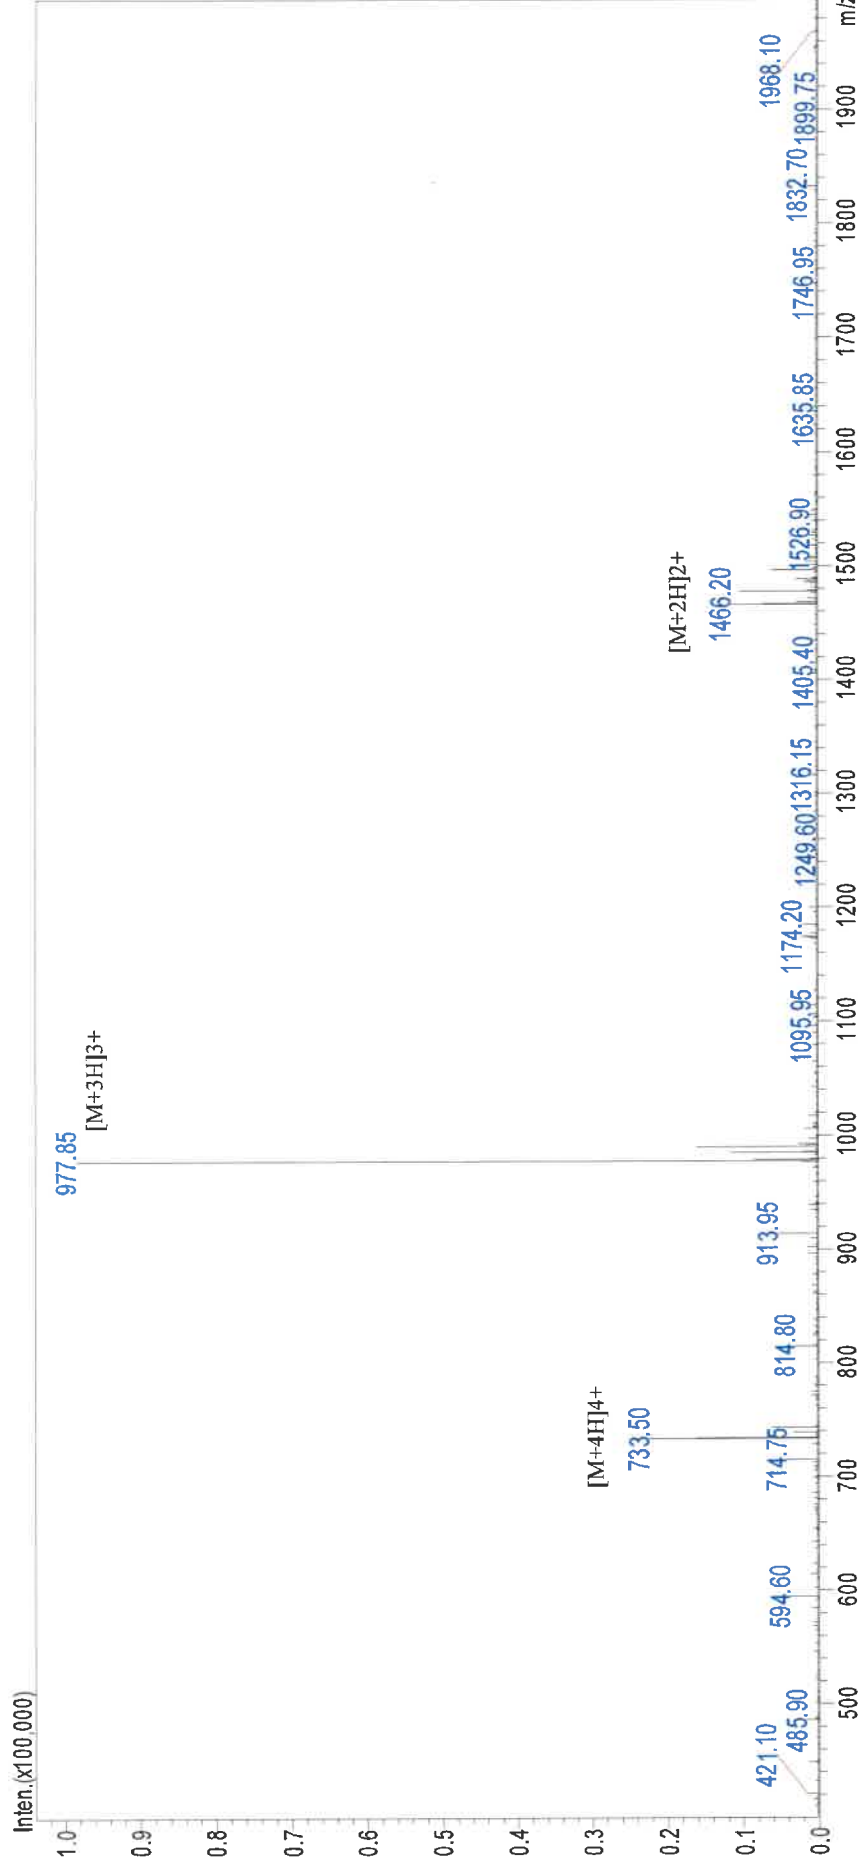

### Sample Description

Analyzed date: 2014-12-1  
Analyst: Xiong  
Sample: ATRX6590  
M.W.: 2930.27  
Lot. No.: P141126-CP426469

### Instrument

Probe: ESI  
Nebulizer Gas Flow: 1.5L/min  
CDL: -20.0v  
CDL Temp.: 250°C  
Block Temp.: 200°C

### SHIMADZU LCMS-2020

Probe Bias: +4.5kv  
Detector: 1.5kv  
T. Flow: 0.2ml/min  
B. Conc: 50%H2O/50%ACN



Sequence: PENRIAKKMLLEEIKANLSSDEDG

Name: ATRX6790

M.W [M+H<sup>+</sup>]: 2701.07

Purity: 97.35%

Amount: 9.6mg

**HPLC Result**

Lot. No.: P141126-CP426470  
 Column: Gemini-NX 5 $\mu$  C18 110A, 4.6\*250mm  
 Solvent A: A: 0.1% Trifluoroacetic Acid in 100% Acetonitrile  
 Solvent B: B: 0.1% Trifluoroacetic Acid in 100% Water  
 Gradient:

|         | A    | B   |
|---------|------|-----|
| 0.0min  | 20%  | 80% |
| 25.0min | 45%  | 55% |
| 25.1min | 100% | 0%  |
| 30.0min | Stop |     |

Volume: 10 $\mu$ l Wavelength: 220nm Flow rate: 1.0ml/min

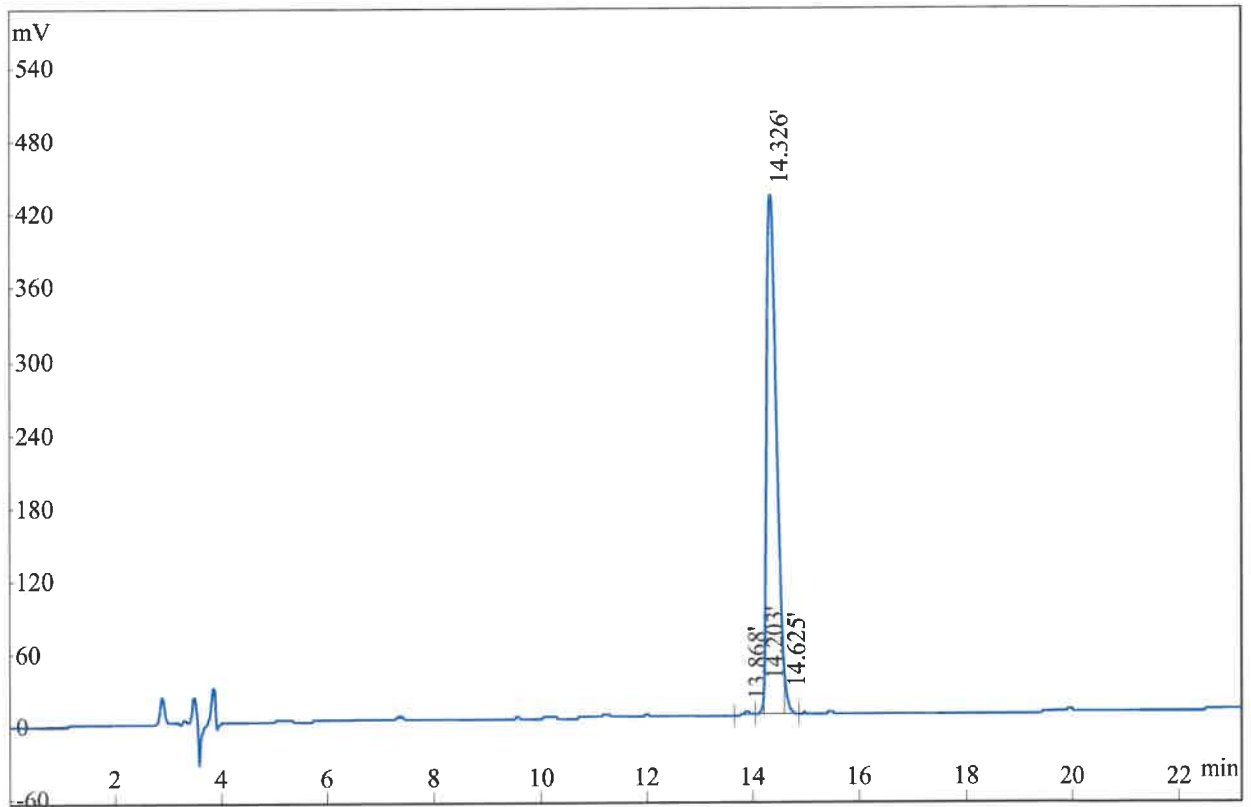

| Rank  | Time   | Conc.    | Area    |
|-------|--------|----------|---------|
| 1     | 13.868 | 0.3909   | 20035   |
| 2     | 14.203 | 0.6142   | 31478   |
| 3     | 14.326 | 97.3510  | 4988946 |
| 4     | 14.625 | 1.6439   | 84247   |
| Total |        | 100.0000 | 5124706 |

**ATRX 1267-1290**  
**Mass Spectrometry**

CHEMPEPTIDE LIMITED

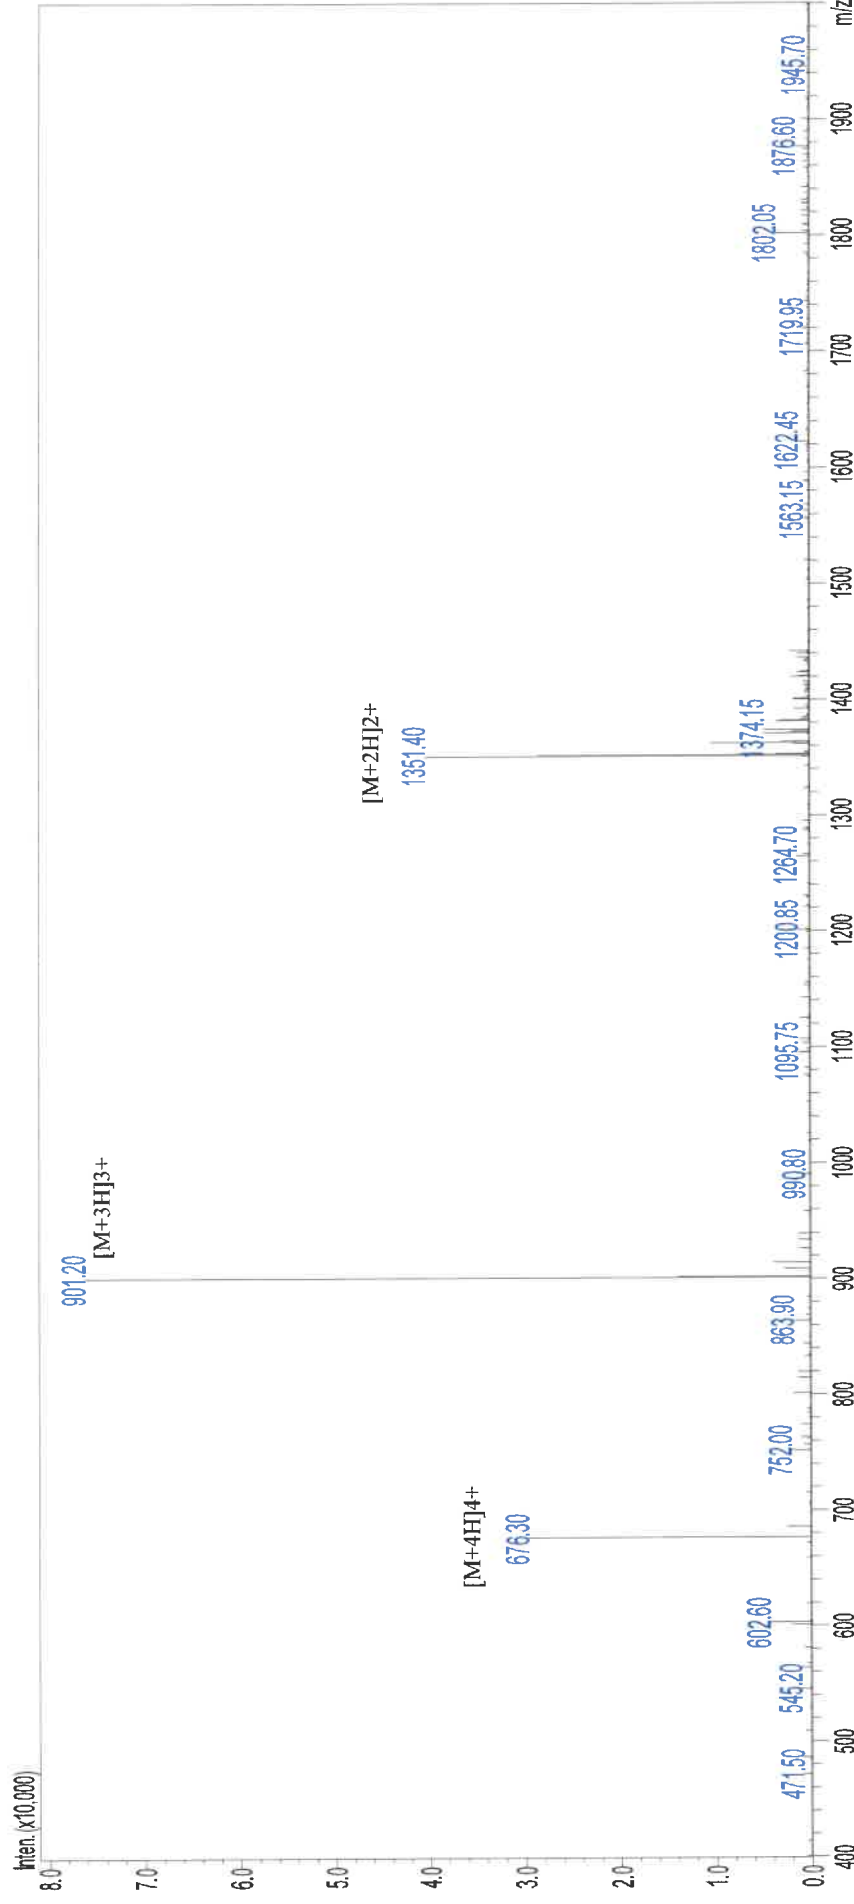

**Sample Description**

Analyzed date: 2014-12-1  
Analyst: Xiong  
Sample: ATRX6790  
M.W.: 2701.07  
Lot. No.: P141126-CP426470

**SHIMADZU LCMS-2020**

| Instrument          | Probe Bias:   |
|---------------------|---------------|
| Probe:              | ESI           |
| Nebulizer Gas Flow: | + 4.5kv       |
| CDL:                | 1.5L/min      |
| CDL Temp.:          | Detector:     |
| Block Temp.:        | T. Flow:      |
|                     | B. Conc:      |
|                     | 0.2ml/min     |
|                     | 50%H2O/50%ACN |

## ATRX 1267-1284

Clare-10102014, PENRIAKKMLLEEIKANL-NH2

cr-0399-124-p2-1

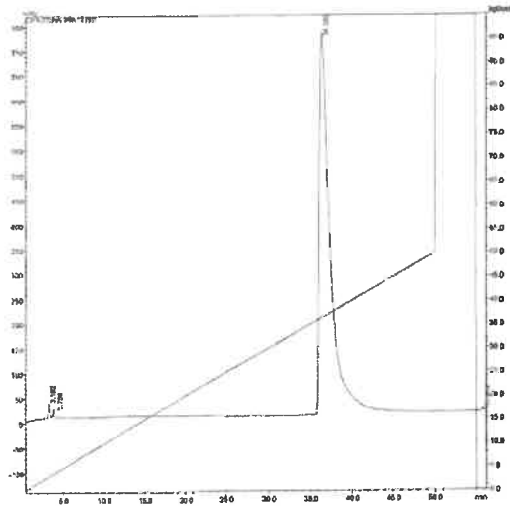

Th. MH+: 2010.57

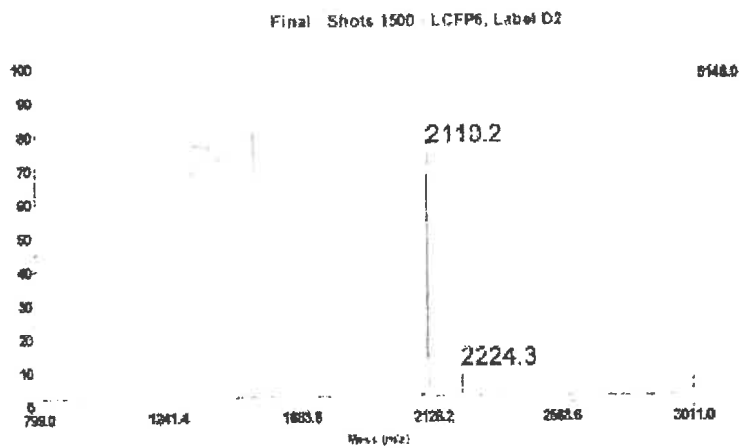

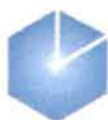**MIMOTOPES**

The Peptide Company

Mimotopes Pty Ltd ABN 90 090 841 286

11 Duerdin Street  
Clayton Victoria 3168  
Australia  
Tel +61 3 9565 1111  
Fax +61 3 9565 1199  
mimotopes@mimotopes.com  
www.mimotopes.com

# Certificate of Analysis

**ATRX 1264-1285**

## Custom Synthesized Peptide

Order Number : **27797**  
Peptide Number : **2779701**  
Theoretical Molecular Weight : **2,541.90**  
Observed Molecular Weight : **MS Analysis detected molecular ions consistent with the parent**  
Sequence : **H-DNDPENRIAKKMLLEEIKANLS-OH**

At the N-terminus, H- means Free amine. At the C-terminus, -OH means Free acid  
Sequence is in standard single letter code (unless otherwise specified), amino terminus is on the left.

Requested : **5mg at 90% by HPLC**

Supplied :

| Tube | Mass (mg) | Minimum Purity (%) |
|------|-----------|--------------------|
| 1    | 9.5       | 93                 |

Comments :

Amino Acid Code Sequence :

Asp-Asn-Asp-Pro-Glu-Asn-Arg-Ile-Ala-Lys-Lys-Met-Leu-Leu-Glu-Glu-Ile-Lys-Ala-Asn-Leu-Ser

Quality Assured by : \_\_\_\_\_ Monday, 24 October 2016

C. Pham - Quality Assurance Department

For any technical enquiries please contact: [peptide\\_support\\_group@mimotopes.com](mailto:peptide_support_group@mimotopes.com)  
For Material Safety Data information please email :  
[mimotopes@mimotopes.com](mailto:mimotopes@mimotopes.com), requesting "Custom Synthesized Peptide" MSDS

CONC DAXX = 97.5  $\mu$ M.

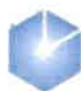

**MIMOTOPES**  
The Peptide Company

## ANALYTICAL DATA

Product Name 2779701  
Lot No P2779701-JQ537508  
Column 4.6×250mm, YMC-Triart C18  
Solvent A 0.1% trifluoroacetic in 100% acetonitrile  
Solvent B 0.1% trifluoroacetic in 100% water  
Gradient  
    A      B  
0.01min 10% 90%  
25min 67% 33%  
25.1min 100% 0%  
30min STOP  
Flow rate 1.0 mL/min  
Wavelength 214nm  
Volume 5ul

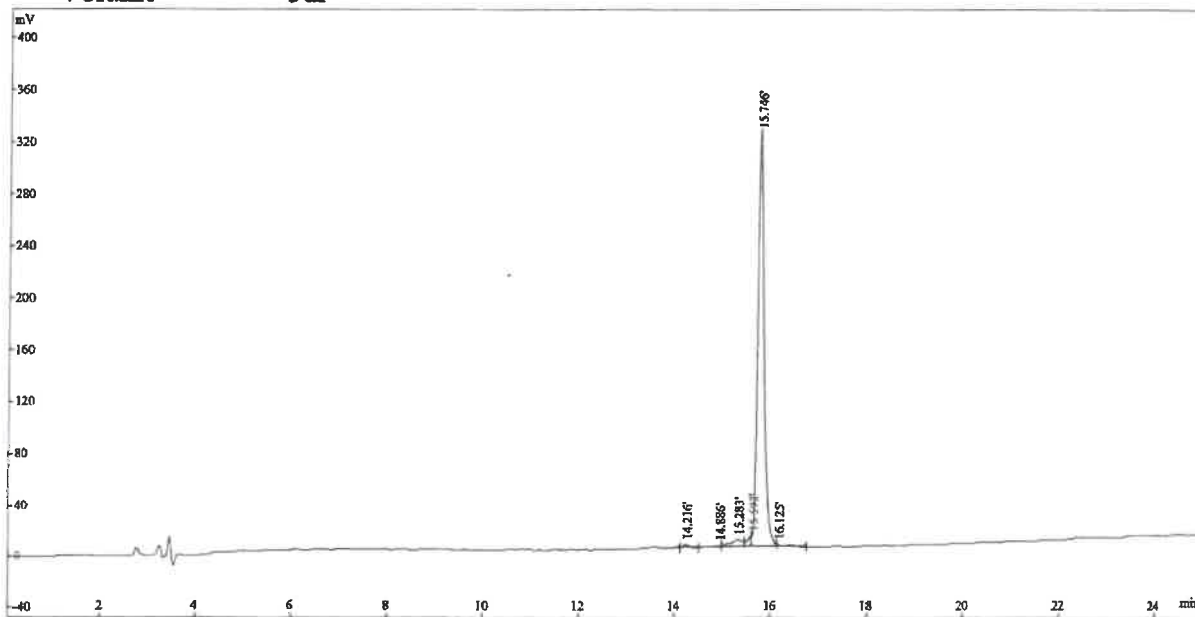

| Rank  | Time   | Conc.  | Area     | Height  |
|-------|--------|--------|----------|---------|
| 1     | 14.216 | 0.6066 | 19280    | 2667    |
| 2     | 14.886 | 0.7783 | 24736    | 1795    |
| 3     | 15.283 | 3.483  | 110704   | 5601    |
| 4     | 15.592 | 1.688  | 53637    | 8454    |
| 5     | 15.746 | 92.53  | 2940776  | 326979  |
| 6     | 16.125 | 0.9064 | 28807    | 1831    |
| Total |        | 100    | 13762734 | 1361070 |

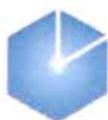

# Certificate of Analysis

**SPEP 1**

## Custom Synthesized Peptide

Order Number : **29315**  
Peptide Number : **2931501**  
Theoretical Molecular Weight : **2,738.12**  
Observed Molecular Weight : **MS Analysis detected molecular ions consistent with the parent**  
Sequence : **H-SDDNDPEN(1151)IAK(1151)MLLEEIKANLS-OH**

At the N-terminus, H- means Free amine. At the C-terminus, -OH means Free acid.  
Sequence is in standard single letter code (unless otherwise specified), amino terminus is on the left.  
(1151) in sequence means (S)-2-(4'-pentenyl) alanine

Requested : **1mg at 90% by HPLC**

**Supplied :**

| Tube | Mass (mg) | Minimum Purity (%) | Solubility Information | mg/mL | Buffer                                           |
|------|-----------|--------------------|------------------------|-------|--------------------------------------------------|
| 1    | 3.4       | 90                 | Soluble                | 6.0   | 0-20% Acetonitrile in 100Mm Ammonium Bicarbonate |

\* Solubility Information provided was as used in the purification processes and is for information only. Many other solubilization conditions may be effective and we advise trying simpler methods first. (See 'A Guide to Handling and Storing Peptides').

**Comments :**

Amino Acid Code Sequence :

Ser-Asp-Asp-Asn-Asp-Pro-Glu-Asn-PntAla-Ile-Ala-Lys-PntAla-Met-Leu-Leu-Glu-Glu-Ile-Lys-Ala-Asn-Leu-Ser

Supplied as stapled peptide.

LCMS analysis the molecular ions consistent with the parent are found throughout the peak at 7.14 mins.

The reported purity is the sum under the peaks 11.52-12.32 observed in the HPLC trace.

Quality Assured by :  Monday, 30 April 2018

C. Pham - Quality Assurance Department

For any technical enquiries please contact: [peptide\\_support\\_group@mimotopes.com](mailto:peptide_support_group@mimotopes.com)  
For Material Safety Data information please email :  
[mimotopes@mimotopes.com](mailto:mimotopes@mimotopes.com), requesting "Custom Synthesized Peptide" MSDS

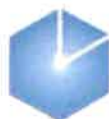

# Certificate of Analysis

**SPEP 2**

## Custom Synthesized Peptide

Order Number : 29315  
Peptide Number : 2931502  
Theoretical Molecular Weight : 2,778.12  
Observed Molecular Weight : MS Analysis detected molecular ions consistent with the parent  
Sequence : H-SDDNDPENR(1151)AKK(1151)LLEEIKANLS-OH  
At the N-terminus, H- means Free amine. At the C-terminus, -OH means Free acid.  
Sequence is in standard single letter code (unless otherwise specified), amino terminus is on the left.  
(1151) in sequence means (S)-2-(4'-pentenyl) alanine  
Requested : 1mg at 90% by HPLC

Supplied :

| Tube | Mass (mg) | Minimum Purity (%) | Solubility Information | mg/mL | Buffer                                           |
|------|-----------|--------------------|------------------------|-------|--------------------------------------------------|
| 1    | 6.1       | 93                 | Soluble                | 6.0   | 0-20% Acetonitrile in 100Mm Ammonium Bicarbonate |
| 2    | 2.2       | 98                 | Soluble                | 6.0   | 0-20% Acetonitrile in 100Mm Ammonium Bicarbonate |

\* Solubility information provided was as used in the purification processes and is for information only. Many other solubilization conditions may be effective and we advise trying simpler methods first. (See 'A Guide to Handling and Storing Peptides').

Comments :  
Amino Acid Code Sequence :  
Ser-Asp-Asp-Asn-Asp-Pro-Glu-Asn-Arg-PntAla-Ala-Lys-Lys-PntAla-Leu-Leu-Glu-Glu-Ile-Lys-Ala-Asn-Leu-Ser  
Supplied as stapled peptide.

LCMS analysis of tube 2 indicates the molecular ions consistent with the parent are found throughout the peak at 6.34mins.

The reported purity is the sum under the two peaks observed in the HPLC trace.

Quality Assured by : \_\_\_\_\_ Friday, 27 April 2018

C. Pham - Quality Assurance Department

For any technical enquiries please contact: peptide\_support\_group@mimotopes.com  
For Material Safety Data information please email: mimotopes@mimotopes.com, requesting "Custom Synthesized Peptide" MSDS

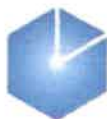

**MIMOTOPES**  
The Peptide Company

Mimotopes Pty Ltd ABN 90 090 841 286

Suite 1, 1st Floor  
Unit 9, 677 Springvale Road  
Mulgrave Victoria 3170  
Australia  
Tel +61 3 9565 1111  
Fax +61 3 9565 1199  
mimotopes@mimotopes.com  
www.mimotopes.com

# Certificate of Analysis

**SPEP 3**

## Custom Synthesized Peptide

Order Number : 29315  
Peptide Number : 2931503  
Theoretical Molecular Weight : 2,765.18  
Observed Molecular Weight : MS Analysis detected molecular ions consistent with the parent  
Sequence : H-SDDNDPENRIAK(1151)MLL(1151)EIKANLS-OH  
At the N-terminus, H- means Free amine. At the C-terminus, -OH means Free acid  
Sequence is in standard single letter code (unless otherwise specified), amino terminus is on the left.  
(1151) in sequence means (S)-2-(4'-pentenyl) alanine  
Requested : 1mg at 90% by HPLC

### Supplied :

| Tube | Mass (mg) | Minimum Purity (%) | Solubility Information | mg/mL | Buffer                                           |
|------|-----------|--------------------|------------------------|-------|--------------------------------------------------|
| 1    | 4.3       | 95                 | Solubility<br>Soluble  | 7.5   | 0-20% Acetonitrile in 100Mm Ammonium Bicarbonate |

\* Solubility information provided was as used in the purification processes and is for information only. Many other solubilization conditions may be effective and we advise trying simpler methods first. (See 'A Guide to Handling and Storing Peptides').

### Comments :

Amino Acid Code Sequence :

Ser-Asp-Asp-Asn-Asp-Pro-Glu-Asn-Arg-Ile-Ala-Lys-PntAla-Met-Leu-Leu-PntAla-Glu-Ile-Lys-Ala-Asn-Leu-Ser

Supply as stapled peptide.

Quality Assured by :  Tuesday, 24 April 2018

C. Pham - Quality Assurance Department

For any technical enquiries please contact: peptide\_support\_group@mimotopes.com  
For Material Safety Data information please email :  
mimotopes@mimotopes.com, requesting "Custom Synthesized Peptide" MSDS



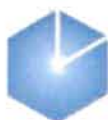**MIMOTOPES**

The Peptide Company

Mimotopes Pty Ltd ABN 90 090 841 286

Suite 1, 1st Floor  
Unit 9, 677 Springvale Road  
Mulgrave Victoria 3170  
Australia  
Tel +61 3 9565 1111  
Fax +61 3 9565 1199  
mimotopes@mimotopes.com  
www.mimotopes.com

# Certificate of Analysis

**SPEP 4**

## Custom Synthesized Peptide

Order Number : **29315**  
Peptide Number : **2931504**  
Theoretical Molecular Weight : **2,822.28**  
Observed Molecular Weight : **MS Analysis detected molecular ions consistent with the parent**

Sequence : **H-SDDNDPENRIAKKMLL(1151)EIK(1151)NLS-OH**

At the N-terminus, H- means Free amine. At the C-terminus, -OH means Free acid.  
Sequence is in standard single letter code (unless otherwise specified), amino terminus is on the left.  
(1151) in sequence means (S)-2-(4'-pentenyl) alanine

Requested : **1mg at 90% by HPLC**

Supplied :

| Tube | Mass (mg) | Minimum Purity (%) | Solubility Information | mg/mL | Buffer   |
|------|-----------|--------------------|------------------------|-------|----------|
| 1    | 3.2       | 94                 | Soluble                | 2.0   | 100% H2O |

\* Solubility information provided was as used in the purification processes and is for information only. Many other solubilization conditions may be effective and we advise trying simpler methods first. (See 'A Guide to Handling and Storing Peptides').

Comments :

Amino Acid Code Sequence :

Ser-Asp-Asp-Asn-Asp-Pro-Glu-Asn-Arg-Ile-Ala-Lys-Lys-Met-Leu-Leu-PntAla-Glu-Ile-Lys-PntAla-Asn-Leu-Ser

Supplied as stapled peptide.

Quality Assured by :  Friday, 27 April 2018

C. Pham - Quality Assurance Department

For any technical enquiries please contact: [peptide\\_support\\_group@mimotopes.com](mailto:peptide_support_group@mimotopes.com)  
For Material Safety Data information please email :  
[mimotopes@mimotopes.com](mailto:mimotopes@mimotopes.com), requesting "Custom Synthesized Peptide" MSDS

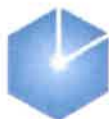

# Certificate of Analysis

**SPEP 5**

## Custom Synthesized Peptide

Order Number : 29315  
Peptide Number : 2931505  
Theoretical Molecular Weight : 2,822.28  
Observed Molecular Weight : MS Analysis detected molecular ions consistent with the parent  
Sequence : H-SDDNDPENR(1152)AKKMLL(1151)EIKANLS-OH

At the N-terminus, H- means Free amine. At the C-terminus, -OH means Free acid.  
Sequence is in standard single letter code (unless otherwise specified), amino terminus is on the left.  
(1151) in sequence means (S)-2-(4'-pentenyl) alanine; (1152) in sequence means (R)-2-(7'-octenyl) alanine

Requested : 1mg at 90% by HPLC

### Supplied :

| Tube | Mass (mg) | Minimum Purity (%) | Solubility Information | mg/mL | Buffer                                           |
|------|-----------|--------------------|------------------------|-------|--------------------------------------------------|
| 1    | 2.4       | 90                 | Soluble                | 6.0   | 0-20% Acetonitrile in 100Mm Ammonium Bicarbonate |

\* Solubility information provided was as used in the purification processes and is for information only. Many other solubilization conditions may be effective and we advise trying simpler methods first. (See 'A Guide to Handling and Storing Peptides').

### Comments :

Amino Acid Code Sequence :

Ser-Asp-Asp-Asn-Asp-Pro-Glu-Asn-Arg-OctAla-Ala-Lys-Lys-Met-Leu-Leu-PntAla-Glu-Ile-Lys-Ala-Asn-Leu-Ser

Supplied as stapled peptide.

LCMS analysis indicates molecular ions consistent with the parent are found throughout the peak at 6.8mins.

The reported purity is the sum under the two peaks observed in the HPLC trace.

Quality Assured by :  Monday, 30 April 2018

C. Pham - Quality Assurance Department

For any technical enquiries please contact: peptide\_support\_group@mimotopes.com  
For Material Safety Data information please email :  
mimotopes@mimotopes.com, requesting "Custom Synthesized Peptide" MSDS

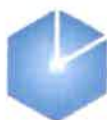**MIMOTOPES**

The Peptide Company

Mimotopes Pty Ltd ABN 90 090 841 286

Suite 1, 1st Floor  
Unit 9, 677 Springvale Road  
Mulgrave Victoria 3170  
Australia

Tel +61 3 9565 1111

Fax +61 3 9565 1199

mimotopes@mimotopes.com

www.mimotopes.com

# Certificate of Analysis

**SPEP 6**

## Custom Synthesized Peptide

Order Number : **29315**  
Peptide Number : **2931506**  
Theoretical Molecular Weight : **2,808.21**  
Observed Molecular Weight : **MS Analysis detected molecular ions consistent with the parent**  
Sequence : **H-SDDNDPENRIAK(1152)MLLEEI(1151)ANLS-OH**

At the N-terminus, H- means Free amine. At the C-terminus, -OH means Free acid.  
Sequence is in standard single letter code (unless otherwise specified), amino terminus is on the left.  
(1151) in sequence means (S)-2-(4'-pentenyl) alanine; (1152) in sequence means (R)-2-(7'-octenyl) alanine

Requested : **1mg at 90% by HPLC**

**Supplied :**

| Tube | Mass (mg) | Minimum Purity (%) | Solubility Information | mg/mL | Buffer                                           |
|------|-----------|--------------------|------------------------|-------|--------------------------------------------------|
| 1    | 3.5       | 90                 | Soluble                | 6.0   | 0-20% Acetonitrile in 100Mm Ammonium Bicarbonate |
| 2    | 3.7       | 91                 | Soluble                | 6.0   | 0-20% Acetonitrile in 100Mm Ammonium Bicarbonate |

\* Solubility information provided was as used in the purification processes and is for information only. Many other solubilization conditions may be effective and we advise trying simpler methods first. (See 'A Guide to Handling and Storing Peptides').

**Comments :****Amino Acid Code Sequence :**

Ser-Asp-Asp-Asn-Asp-Pro-Glu-Asn-Arg-Ile-Ala-Lys-OctAla-Met-Leu-Leu-Glu-Glu-Ile-PntAla-Ala-Asn-Leu-Ser

Supplied as stapled peptide.

LCMS analysis indicates molecular ions consistent with the parent are found throughout the peak at 7.5 and 7.8mins.

The reported purity is the sum under the peaks between 11.86 and 12.73 min the HPLC trace.

Quality Assured by :  Friday, 27 April 2018

C. Pham - Quality Assurance Department

For any technical enquiries please contact: [peptide\\_support\\_group@mimotopes.com](mailto:peptide_support_group@mimotopes.com)  
For Material Safety Data information please email :  
[mimotopes@mimotopes.com](mailto:mimotopes@mimotopes.com), requesting "Custom Synthesized Peptide" MSDS

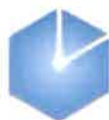**MIMOTOPES**

The Peptide Company

Mimotopes Pty Ltd ABN 90 090 841 286

Suite 1, 1st Floor  
Unit 9, 677 Springvale Road  
Mulgrave Victoria 3170  
Australia

Tel +61 3 9565 1111

Fax +61 3 9565 1199

mimotopes@mimotopes.com

www.mimotopes.com

# Certificate of Analysis

**SPEP 7**

## Custom Synthesized Peptide

Order Number : **29315**  
Peptide Number : **2931507**  
Theoretical Molecular Weight : **2,862.28**  
Observed Molecular Weight : **MS Analysis detected molecular ions consistent with the parent**

Sequence : **H-SDDNDPENRIAKK(1152)LLEEIK(1151)NLS-OH**

At the N-terminus, H- means Free amine. At the C-terminus, -OH means Free acid.

Sequence is in standard single letter code (unless otherwise specified), amino terminus is on the left.

(1151) in sequence means (S)-2-(4'-pentenyl) alanine; (1152) in sequence means (R)-2-(7'-octenyl) alanine

Requested : **1mg at 90% by HPLC**

Supplied :

| Tube | Mass (mg) | Minimum Purity (%) | Solubility Information | mg/mL | Buffer                                           |
|------|-----------|--------------------|------------------------|-------|--------------------------------------------------|
|      | 4.4       | 92                 | Solubility<br>Soluble  | 6.0   | 0-20% Acetonitrile in 100Mm Ammonium Bicarbonate |

\* Solubility information provided was as used in the purification processes and is for information only. Many other solubilization conditions may be effective and we advise trying simpler methods first. (See 'A Guide to Handling and Storing Peptides').

Comments :

Amino Acid Code Sequence :

Ser-Asp-Asp-Asn-Asp-Pro-Glu-Asn-Arg-Ile-Ala-Lys-Lys-OctAla-Leu-Leu-Glu-Glu-Ile-Lys-PntAla-Asn-Leu-Ser

Supplied as stapled peptide.

LCMS analysis indicates molecular ions consistent with the parent are found throughout the peak at 6.8mins.

The reported purity is the sum under the two peaks observed in the HPLC trace.

Quality Assured by :  Friday, 27 April 2018

C. Pham - Quality Assurance Department

For any technical enquiries please contact: [peptide\\_support\\_group@mimotopes.com](mailto:peptide_support_group@mimotopes.com)  
For Material Safety Data information please email :  
[mimotopes@mimotopes.com](mailto:mimotopes@mimotopes.com), requesting "Custom Synthesized Peptide" MSDS

## CERTIFICATE OF ANALYSIS

|                       |                                                                                       |
|-----------------------|---------------------------------------------------------------------------------------|
| Product Name          | Pep1                                                                                  |
| Lot No                | JT-79065                                                                              |
| Sequence              | FAM-DNDPENRIAKK[(S)-2-(4'-pentenyl)alanine]LLEEIK[(R)-2-7-(7'-octenyl)alanine]NLS-NH2 |
| Dissolution condition | 15%ACN+85%H2O                                                                         |
| Length                | AA                                                                                    |
| Modification          | N/A                                                                                   |
| Molecular Weight (MW) | 2989.38                                                                               |
| Storage               | -20°C                                                                                 |

| Test Items          | Specifications            | Results  |
|---------------------|---------------------------|----------|
| Purity by HPLC      | 90%                       | 93.50%   |
| Peptide Content     | N/A                       | N/A      |
| Moisture content    | N/A                       | N/A      |
| Acetic acid content | N/A                       | N/A      |
| Appearance          | yellow lyophilized powder | Conforms |
| Quantity            | 5mg                       | 5.0mg    |

Certified by:  
Quality Assurance  
Department

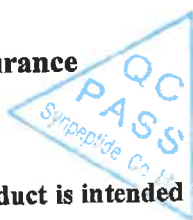

Date 01/16/2019

Note: this product is intended for research use only; not for diagnostic or human use.

Synpeptide Co., Ltd

Address: 320 Lvlín Road, Beicai, Pudong new area, Shanghai, China 201204  
Tel: +86-21-50835580 Fax: +86-21-50835580 P/C: 201204 <http://www.synpeptide.com>

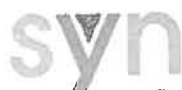

High Quality Peptide

## Sample Information

Order ID : Syn-79065  
 Name : Pep1  
 Sequence : FAM-DNDPENRIAKK[(S)-2-(4'-pentenyl)  
 alanine]LLEEIK[(R)-2-7-(7'-octenyl)alanine]NLS-NH2  
 Lot No : JT-79065  
 Pump A : 0.1% Trifluoroacetic in 100% Water  
 Pump B : 0.1% Trifluoroacetic in 100% Acetonitrile  
 Total Flow : 1ml/min  
 Wavelength : 220nm  
 Analytical column type : SHIMADZU Inertsil ODS-SP (4.6\*250mm\*5um)  
 Inj. Volume : 30ul

| Time  | Module | Action | Value |
|-------|--------|--------|-------|
| 0.00  | Pumps  | B.Conc | 10    |
| 25.00 | Pumps  | B.Conc | 70    |
| 25.01 | Pumps  | B.Conc | 100   |
| 30.00 | Pumps  | B.Conc | 100   |
| 30.01 | Pumps  | Stop   |       |

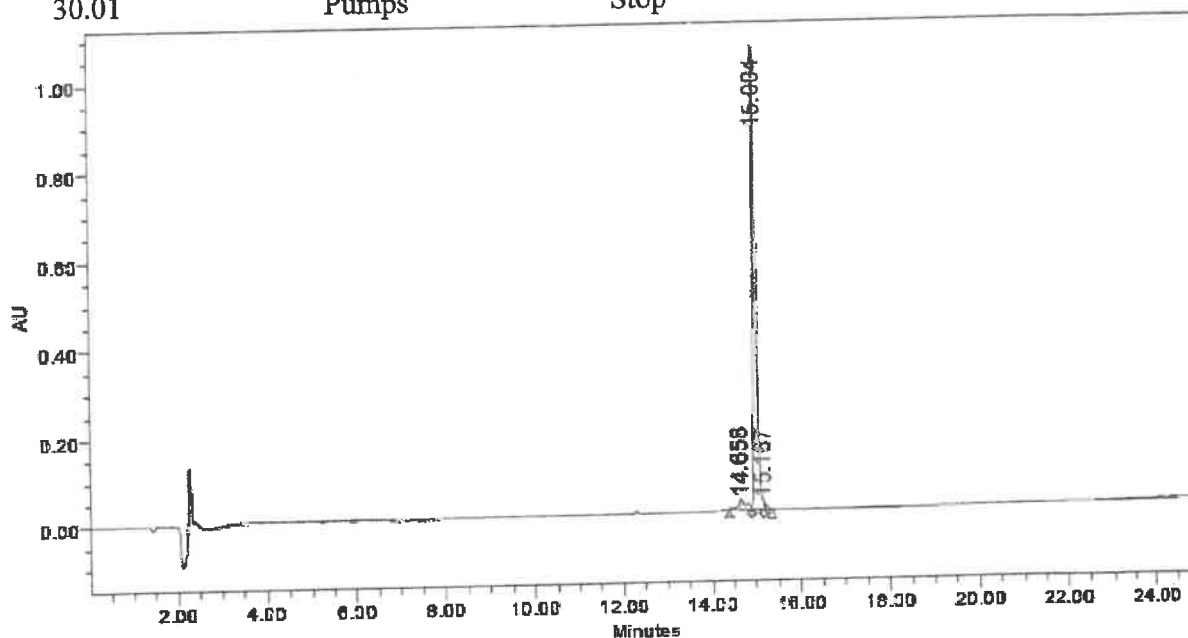

|   | RT     | Area    | % Area | Height  |
|---|--------|---------|--------|---------|
| 1 | 14.658 | 281938  | 5.30   | 23866   |
| 2 | 15.004 | 4974285 | 93.50  | 1034265 |
| 3 | 15.167 | 64027   | 1.20   | 17979   |

Synpeptide Co., Ltd

Address: 320 Lulin Road, Belcal, Pudong new area, Shanghai, China 201204

Tel: +86-21-50835580

Fax: +86-21-50835580

P/C: 201204

<http://www.synpeptide.com>

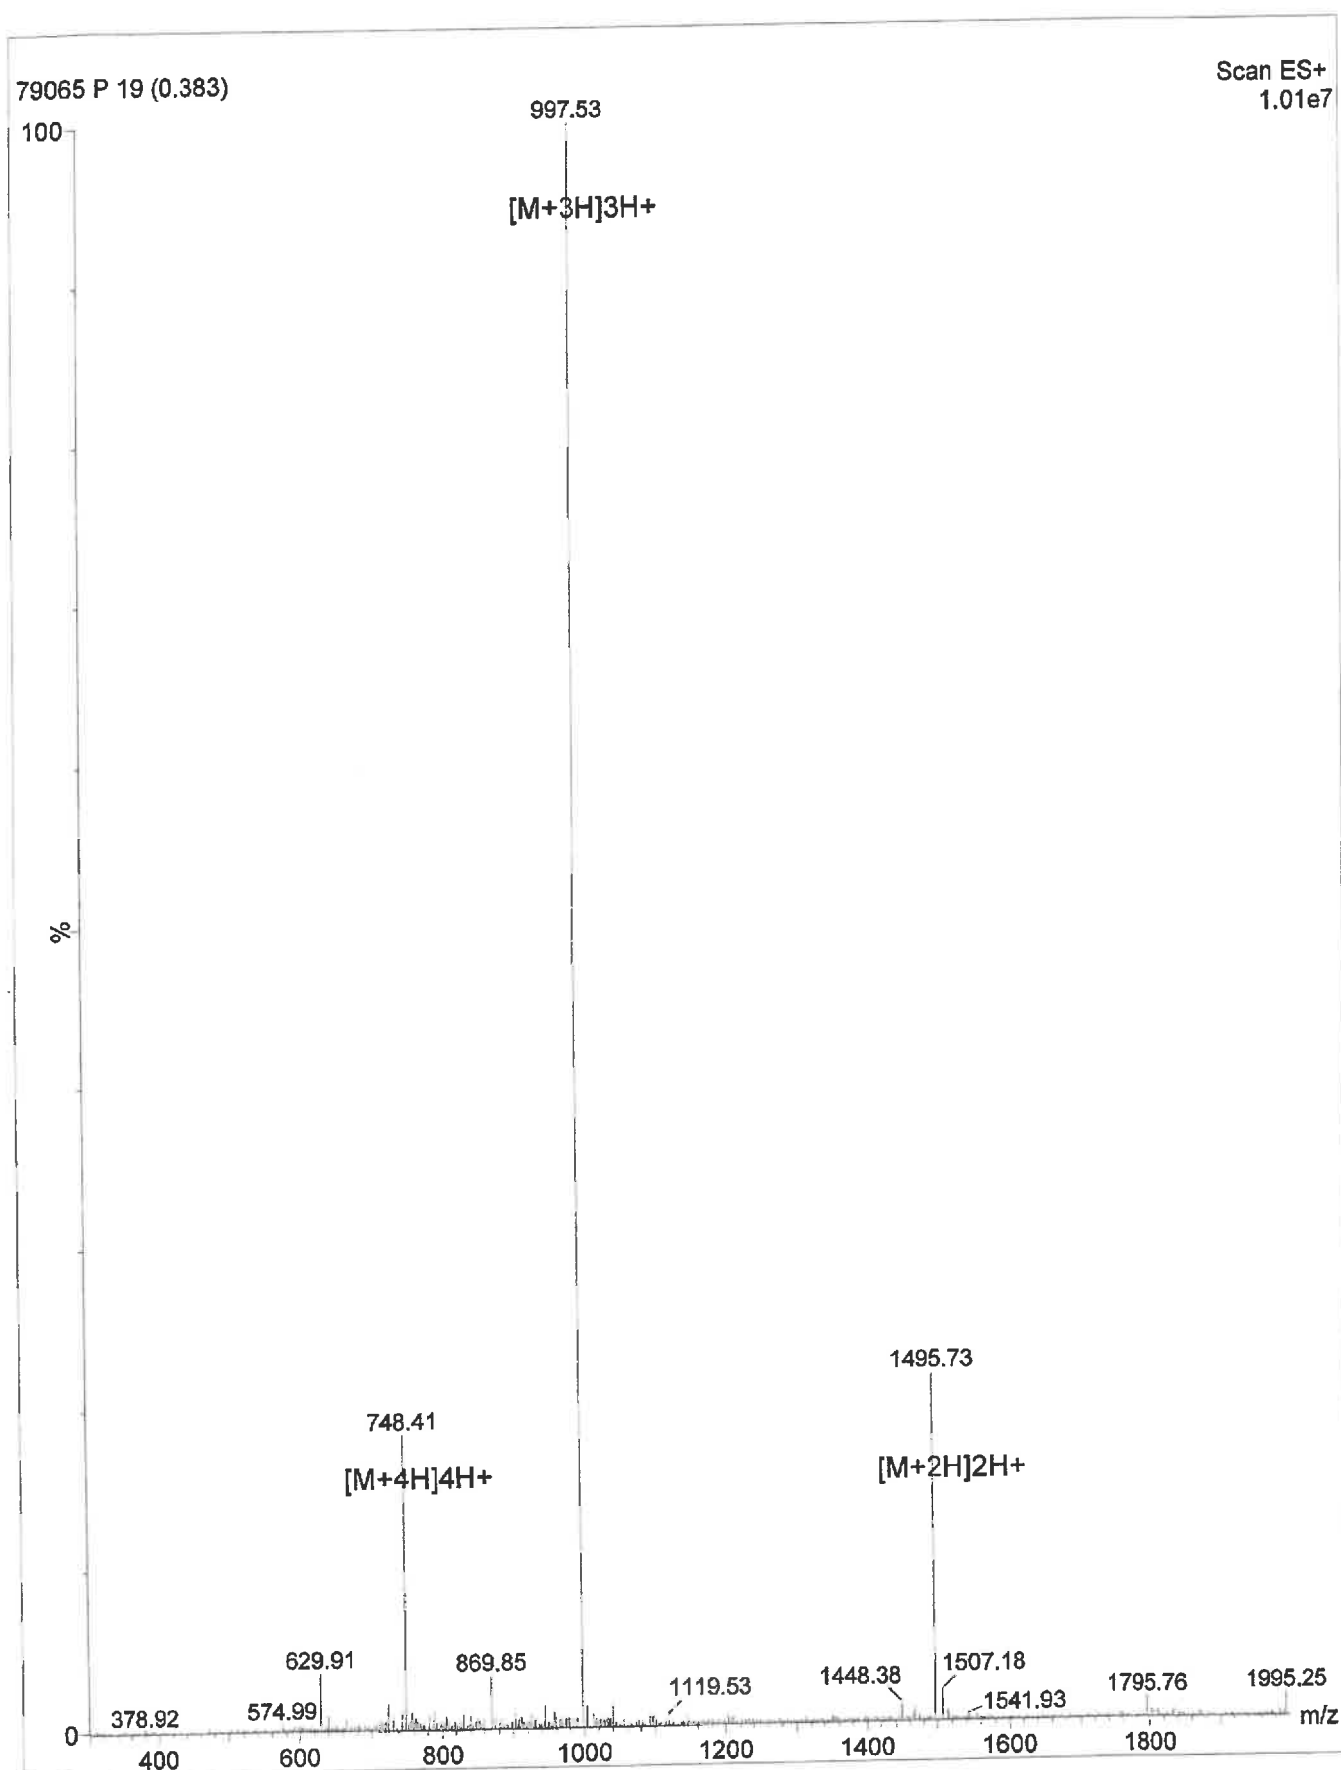

## FAM-STPEP2

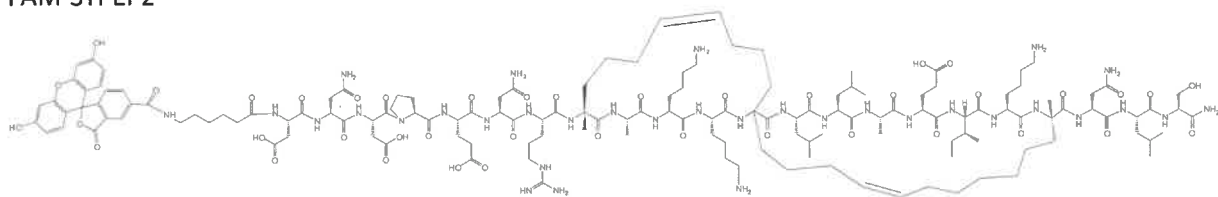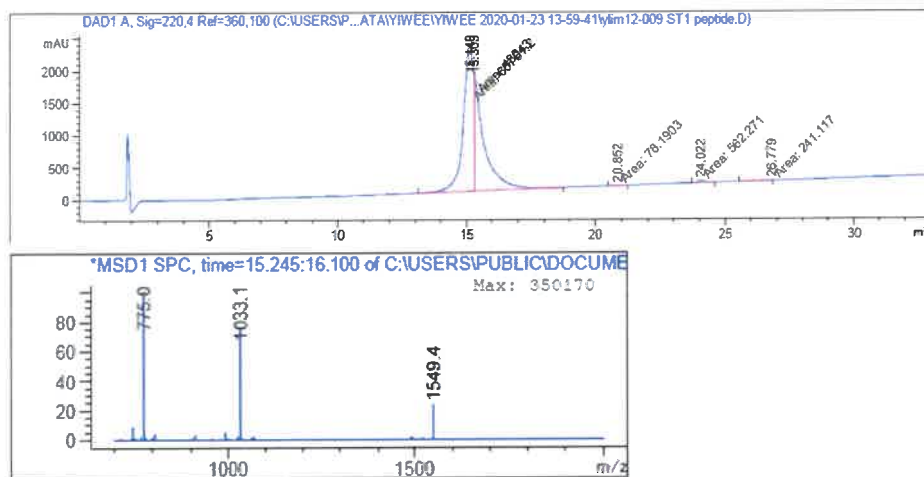

Peptide mass: 3094.64 Da; Purity: 99%

## FAM-STPEP3

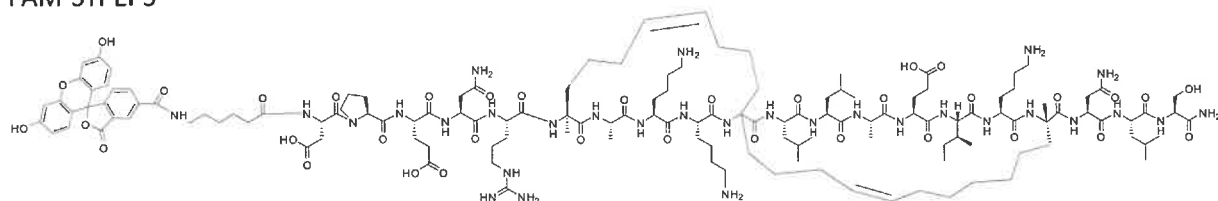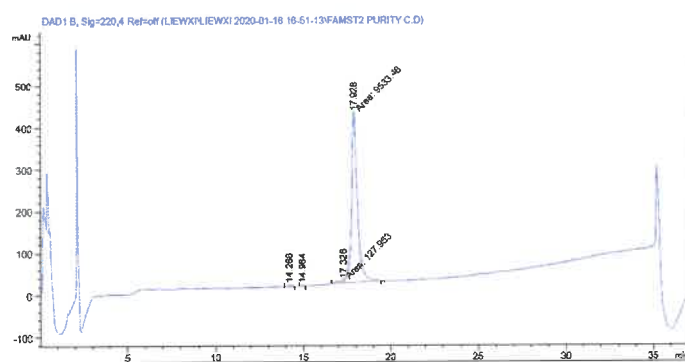



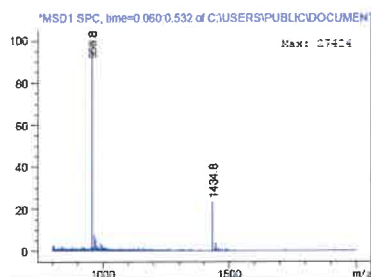

Peptide mass: 2865.57 Da; Purity: 97%

### FAM\_STPEP4

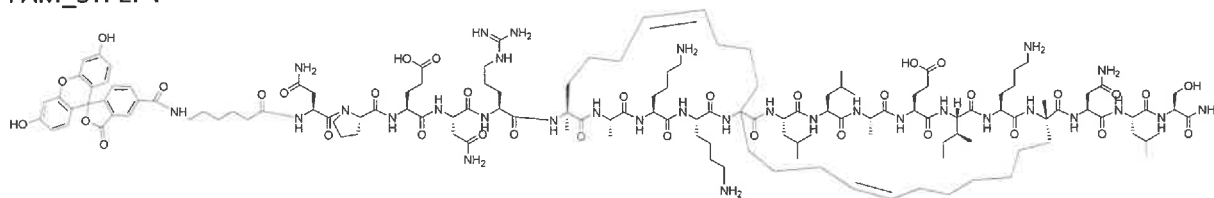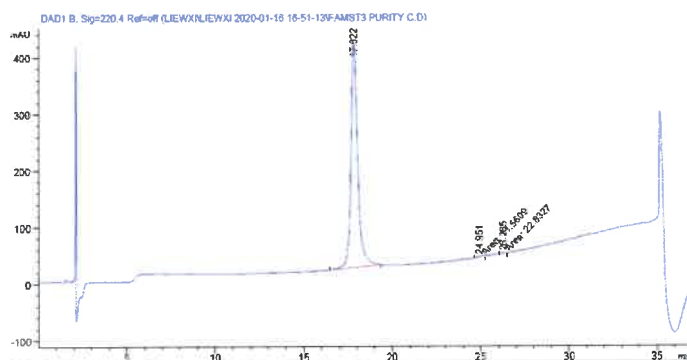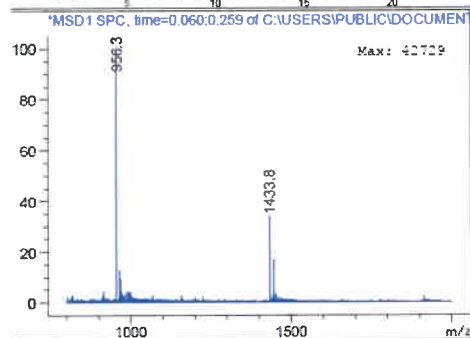

Peptide mass: 2864.58 Da; Purity: 99%

### FAM\_STPEP7

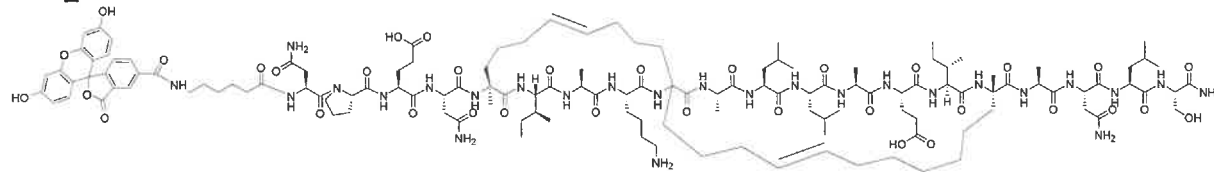

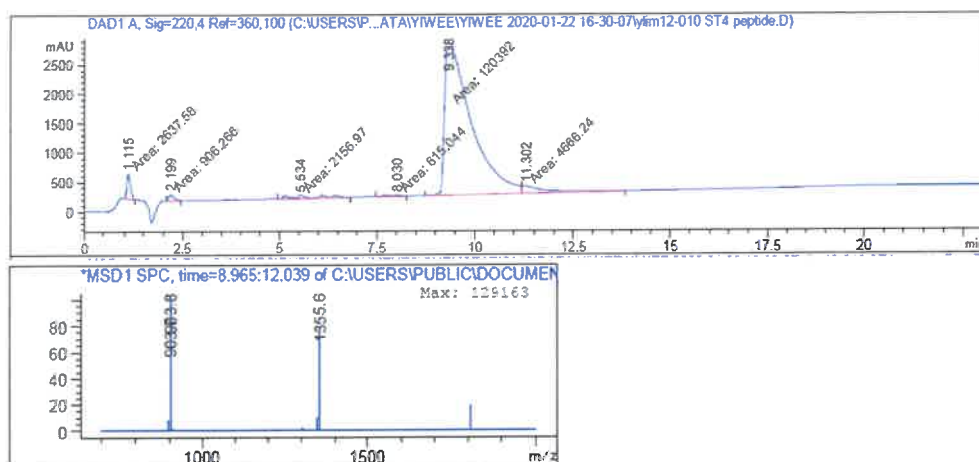

Peptide mass: 2707.45 Da; Purity: 91%

**General information:** RAMAGE resin was obtained from PCAS Biomatrix. Fmoc-amino acids, Hexafluorophosphate Azabenzotriazole Tetramethyl Uronium (HATU), and 1-Hydroxy-7-azabenzotriazole (HOAt) were obtained from Advanced Chemtech (Louisville, KY). 5-carboxy fluorescein was purchased from Beijing Okeanos Tech (Beijing, China). Trifluoroacetic acid (TFA) and N, N-Diisopropylethylamine (DIPEA) was purchased from Tokyo Chemical Industry (Tokyo, Japan) while all other solvents and reagents were obtained from Fisher Scientific (Loughborough, United Kingdom). All reagents were used as received.

**Solid-phase peptide synthesis:** The linear peptide was synthesized on the CEM peptide synthesizer. 1 M OxymaPure with 0.1 M DIPEA in DMF was used as the coupling agent and 0.5 M DIC in DMF was the activating agent. Fmoc deprotection was done with 20% Piperidine in DMF. Following ring closing metathesis, 5-carboxy fluorescein was coupled onto the N-terminus manually with pre-activated solutions (7 min) of 2.8 eq. HATU, 3 eq. HOAt, and 6 eq. DIPEA for 1 h.

**Ring closing metathesis:** 0.2 equiv. Grubbs I catalyst was dissolved in DCE (5 mg/mL) was bubbled in the resin for four times for two hours each.

**Cleavage:** Following synthesis, the peptide resin was shrunk and dried with washes of methanol and diethyl ether. It was cleaved from the resin with a cleavage cocktail of TFA/Tips/H<sub>2</sub>O (95:2.5:2.5) for 2 h. The resin was filtered off and peptide precipitated in diethyl ether (50 mL). The peptide was re-dissolved in a mixture of ACN/H<sub>2</sub>O (1:1) and lyophilised.

**Peptide purification and analysis:** The dried peptide was re-dissolved in acetonitrile and water (1:1) and purified *via* reverse-phase HPLC using an Agilent 1260 Infinity system fitted with a Phenomenex® preparative column (Jupiter C12, 4 µm, Proteo 90 Å, 250 x 10 mm). Eluents used were 0.1% aqueous TFA in water and 0.1% TFA in acetonitrile. Peptide purity and molecular weight were confirmed *via* UPLC-MS using an Agilent 1260 Infinity II system fitted with a Phenomenex® analytical column (Aeris 1.7 µm, Peptide XB-C18 100 LC Column, 150 x 2.1 mm). Eluents used were 0.1% aqueous formic acid in water and 0.1% formic acid in acetonitrile.

[illegible]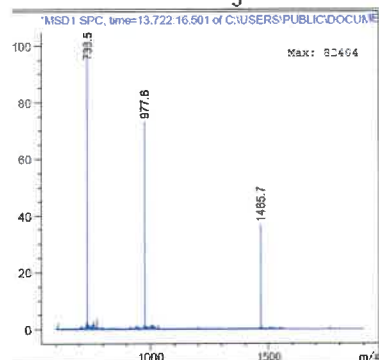

CA-STPEP7

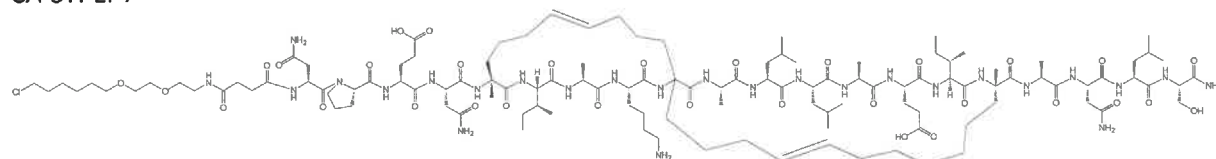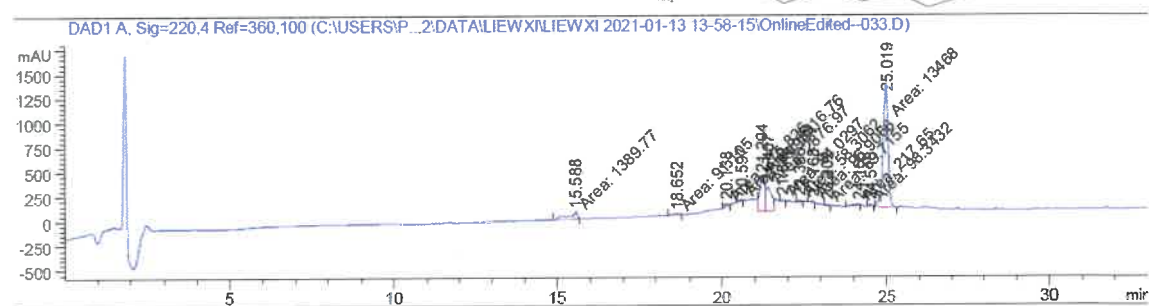

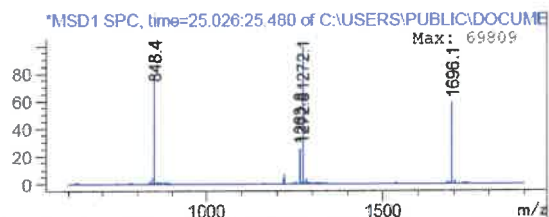

Peptide mass: 2543.52 Da; Purity: 60%

**General information:** RAMAGE resin was obtained from PCAS Biomatrix. Fmoc-amino acids, Hexafluorophosphate Azabenzotriazole Tetramethyl Uronium (HATU), and 1-Hydroxy-7-azabenzotriazole (HOAt) were obtained from Advanced Chemtech (Louisville, KY). Halotag was purchased from Beijing Okeanos Tech (Beijing, China). Trifluoroacetic acid (TFA) and N, N-Diisopropylethylamine (DIPEA) was purchased from Tokyo Chemical Industry (Tokyo, Japan) while all other solvents and reagents were obtained from Fisher Scientific (Loughborough, United Kingdom). All reagents were used as received.

**Solid-phase peptide synthesis:** The linear peptide was synthesized on the CEM peptide synthesizer. 1 M OxymaPure with 0.1 M DIPEA in DMF was used as the coupling agent and 0.5 M DIC in DMF was the activating agent. Fmoc deprotection was done with 20% Piperidine in DMF. Following ring closing metathesis, Halotag was coupled onto the N-terminus manually with pre-activated solutions (7 min) of 2.8 eq. HATU, 3 eq. HOAt, and 6 eq. DIPEA for 1 h.

**Ring closing metathesis:** 0.2 equiv. Grubbs I catalyst was dissolved in DCE (5 mg/mL) was bubbled in the resin for four times for two hours each.

**Cleavage:** Following synthesis, the peptide resin was shrunk and dried with washes of methanol and diethyl ether. It was cleaved from the resin with a cleavage cocktail of TFA/Tips/H<sub>2</sub>O (95:2.5:2.5) for 2 h. The resin was filtered off and peptide precipitated in diethyl ether (50 mL). The peptide was re-dissolved in a mixture of ACN/H<sub>2</sub>O (1:1) and lyophilised.

**Peptide purification and analysis:** The dried peptide was re-dissolved in acetonitrile and water (1:1) and purified *via* reverse-phase HPLC using an Agilent 1260 Infinity system fitted with a Phenomenex<sup>®</sup> preparative column (Jupiter C12, 4  $\mu$ m, Proteo 90 Å, 250 x 10 mm). Eluents used were 0.1% aqueous TFA in water and 0.1% TFA in acetonitrile. Peptide purity and molecular weight were confirmed *via* UPLC-MS using an Agilent 1260 Infinity II system fitted with a Phenomenex<sup>®</sup> analytical column (Aeris 1.7  $\mu$ m, Peptide XB-C18 100 LC Column, 150 x 2.1 mm). Eluents used were 0.1% aqueous formic acid in water and 0.1% formic acid in acetonitrile.

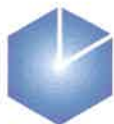**MIMOTOPES**

The Peptide Company

Mimotopes Pty Ltd ABN 90 090 841 286

Suite 1, 1st Floor  
Unit 9, 677 Springvale Road  
Mulgrave Victoria 3170  
Australia  
Tel +61 3 9565 1111  
Fax +61 3 9565 1199  
mimotopes@mimotopes.com  
www.mimotopes.com

# Certificate of Analysis

P53

## Custom Synthesized Peptide

Order Number : **32113**  
Peptide Number : **3211301**  
Theoretical Molecular Weight : **2,312.52**  
Observed Molecular Weight : **MS Analysis detected molecular ions consistent with the parent**  
Sequence : **Ac-AMDDLMLSPDDIEQWFTED-NH2**  
At the N-terminus, Ac- means acetyl. At the C-terminus, -NH2 means Amide.  
Sequence is in standard single letter code (unless otherwise specified), amino terminus is on the left.

Requested : **5mg at 90% by HPLC**

Supplied :

| Tube | Mass (mg) | Minimum Purity (%) |
|------|-----------|--------------------|
| 1    | 5.1       | 90                 |

Comments :

Amino Acid Code Sequence :

Ala-Met-Asp-Asp-Leu-Met-Leu-Ser-Pro-Asp-Asp-Ile-Glu-Gln-Trp-Phe-Thr-Glu-Asp

Quality Assured by :  Thursday, 25 June 2020

C. Pham - Quality Assurance Department

For any technical enquiries please contact: [peptide\\_support\\_group@mimotopes.com](mailto:peptide_support_group@mimotopes.com)  
For Material Safety Data information please email: [mimotopes@mimotopes.com](mailto:mimotopes@mimotopes.com), requesting "Custom Synthesized Peptide" MSDS

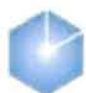

Product Name 3211301  
Lot No P3211301-HS807598  
Column Gemini-NX 5 $\mu$  C18 110A, 4.6\*250mm  
Solvent A 0.1%Trifluoroacetic in 100% Acetonitrile  
Solvent B 0.1%Trifluoroacetic in 100% Water  
Gradient  
0.01min A B  
25min 30% 70%  
25.01min 70% 30%  
25.01min 100% 0%  
30min Stop

Flow rate 1.0ml/min

Wavelength 214nm

Volume 20ul

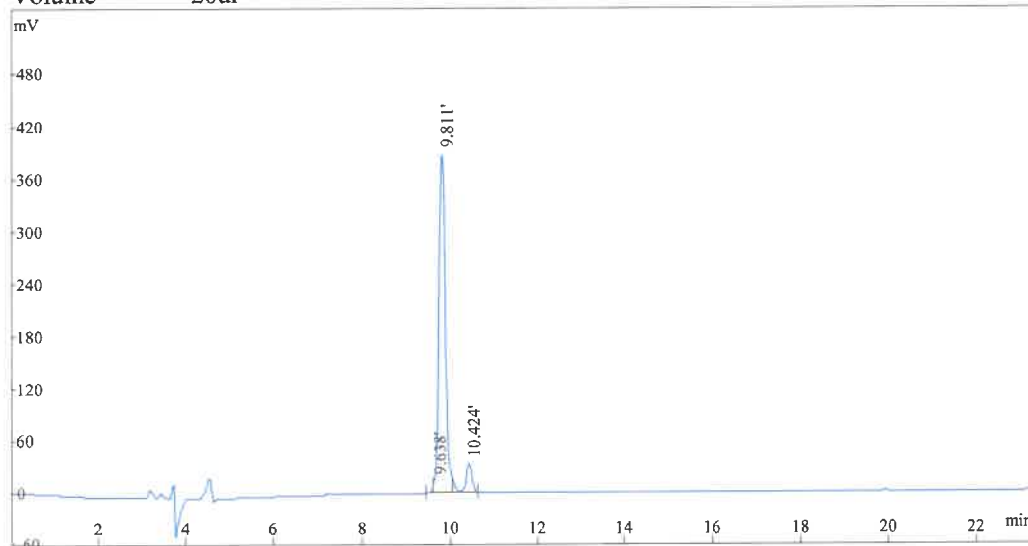

| Rank  | Time   | Conc.   | Area    | Height |
|-------|--------|---------|---------|--------|
| 1     | 9.638  | 0.7101  | 28115   | 14335  |
| 2     | 9.811  | 90.4273 | 3580304 | 389022 |
| 3     | 10.424 | 8.8626  | 350898  | 33662  |
| Total |        | 100     | 3959317 | 437019 |

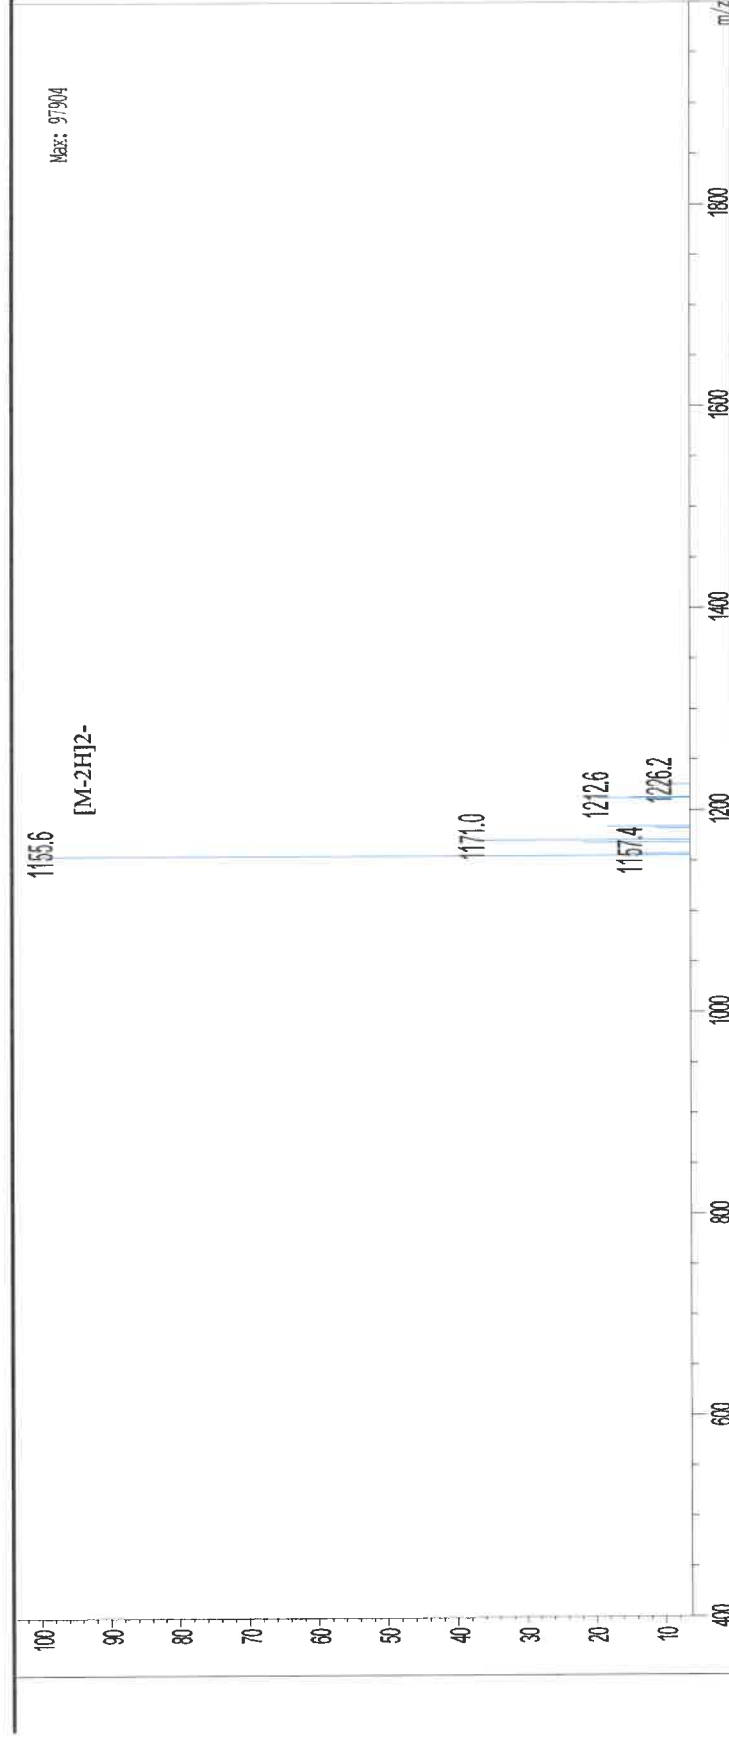

Data Acquired : 12/06/2020 14:16:21 PM

Injection Volume : 1

Sample Name : 3211301

Mw : 2312.48

Lot No. : P3211301-HS807598

Probe : ESI Probe bias : +4.5kv  
Nebulizer Gas Flow : 1.5L/min Detector : 2.0kv  
CDL : -20.0v T.Flow : 0.2ml/min  
CDL Temp : 250°C B.conc : 50%H<sub>2</sub>O/50%ACN  
Block Temp : 200°C
